# Supplementary material for: Identifying Determinants of EGFR-Targeted Therapeutic Biochemical Efficacy Using Computational Modeling
Source: PubMed Central journal article supplement — CPT Pharmacometrics Syst Pharmacol. 2014 Oct 15;3(10):e141–. doi: 10.1038/psp.2014.39 (PMC4474171; doi:10.1038/psp.2014.39), 2014-10-15
Supplement: psp201439x4.pdf [file psp201439x4.pdf]

**Supplemental Material for “Identifying Determinants of EGFR-Targeted Therapeutic Biochemical Efficacy Using Computational Modeling,” Calixte S. Monast and Matthew J. Lazzara**

**Supplemental Figure Legends**

**Figure S1: Local sensitivity analysis to identify determinants of  $t_{50}$  values for 50 nM gefitinib and cetuximab.** Sensitivity of  $t_{50}$  values to perturbations of 10-fold in each of the model parameters was computed for (A) gefitinib or (B) cetuximab. Sensitivities were reported as the absolute value of the difference in the logarithm of the base  $t_{50}$  and the perturbed  $t_{50}$  values and then normalized to the maximum. This analysis was performed for 1.6 nM EGF, 1.6 nM AR, and 160 nM AR and 50 nM therapeutic.

**Figure S2: Local sensitivity analyses to identify determinants of  $IC_{50}$  and  $t_{50}$  values calculated for the effect of gefitinib and cetuximab on EGFR-GRB2 association.** Sensitivity of  $IC_{50}$  (A and B) or  $t_{50}$  (C and D) values for EGFR-GRB2 association (instead of EGFR phosphorylation) to perturbations of 10-fold in each of the model parameters was computed for (A and C) gefitinib or (B and D) cetuximab. Sensitivities were reported as the absolute value of the difference in the logarithm of the base  $IC_{50}$  or  $t_{50}$  and the perturbed values and then normalized to the maximum. This analysis was performed for 1.6 nM EGF, 1.6 nM AR, and 160 nM AR and 1  $\mu$ M therapeutic.

**Figure S3: Comparison of previously published experimental data used to train the model and best-fit model results.** To determine dephosphorylation parameters the model (lines) was fit to previously published experimental data (filled circles)<sup>1</sup> for the effects of: (A) 1 or 10 ng/mL EGF or 100  $\mu$ M of the phosphatase inhibitor pervanadate (PV); or (B and C) 4  $\mu$ M gefitinib on

EGFR phosphorylation (pEGFR). For (A), times indicate incubation times for each compound. For panels (B) and (C), times indicate incubation times of gefitinib after a 4 min incubation with the indicated concentration of EGF. Measurements were made in parental HeLa cells (A and B) or HeLa cells with impaired EGFR internalization through expression of the K44A dynamin mutant (C). Data from K44A HeLa cells were included to help constrain the rate of EGFR dephosphorylation at the cell surface. Percentages of phosphorylated EGFR were measured using an immunoprecipitation approach described in detail in our previous study.<sup>1</sup>

### **References for figure legends**

1. Monast CS, Furcht CM, Lazzara MJ. Computational analysis of the regulation of EGFR by protein tyrosine phosphatases. *Biophys J* 2012, **102**(9): 2012-2021.

## Description of Model Framework

### Model Reactions

For each type of reaction, the following information is provided:

1. Compartment in which the reaction occurs;
2. Example reaction;
3. Description of the various species that participate in the reaction (unless otherwise noted, this description does not depend upon which compartment the receptor is in).

### key:

R = EGF receptor monomer

L= ligand (EGF or AR)

A = ATP

(LR) = ligand-receptor complex

(LAR) = ligand- and ATP-bound receptor complex

(AR) = ATP-bound receptor

X<sub>p</sub> = phosphorylated receptor species X (could be R, LR, LAR)

G2 = GRB2 adapter

(G2Rp) = GRB2-phosphorylated receptor complex

T<sub>gef</sub> = therapeutic (gefitinib)

T<sub>cet</sub> = therapeutic (cetuximab)

(T<sub>x</sub>R) = therapeutic x-receptor complex

[(X)(Y)] = species X and Y in a dimer complex

X<sub>s</sub> or (X)<sub>s</sub> = species or complex X present in the cell surface compartment

X<sub>i</sub> or (X)<sub>i</sub> = species or complex X present in the cell interior compartment

forward reactions are indicated by “→”

reversible reactions are indicated by “↔”

### *Ligand binding*

Example reaction:  $L + R \leftrightarrow (LR)$

Compartments: surface and cell interior

Parameters:  $k_{L,fs}$ ,  $k_{L,rs}$ ,  $k_{L,fi}$ ,  $k_{L,ri}$

Relevant species: Ligand binds receptor monomers and dimers that are not ligand- or cetuximab-bound.

### *Cetuximab binding*

Example:  $T_{cet} + R \leftrightarrow (T_{cet}R)$

Compartments: surface

Parameters:  $k_{c,f}$ ,  $k_{c,r}$

Rules: In the cell surface compartment, cetuximab binds receptor monomer species that are not ligand- or cetuximab-bound.

### *ATP binding*

Example:  $A + R \leftrightarrow (AR)$

Compartments: surface and interior

Parameters:  $k_{A,f}$ ,  $k_{A,r}$

Rules: ATP binds receptors that are not ATP- or gefitinib-bound.

### *Gefitinib binding*

Example:  $T_{\text{gef}} + R \leftrightarrow (T_{\text{gef}}R)$

Compartments: surface and interior

Parameters:  $k_{g,f}$ ,  $k_{g,r}$

Rules: Gefitinib binds receptor species that are not ATP-bound or gefitinib-bound.

### *Dimerization*

Example:  $(LR) + (LR) \leftrightarrow [(LR)(LR)]$

Compartments: surface and interior

Parameters:  $k_{d,rL}$ ,  $k_{d,r}$ ,  $k_{d,fs}$ ,  $k_{d,fi}$

Rules: Dimerization occurs between identical receptor monomers. For example, two monomers bound with ATP are permitted to dimerize, but a monomer bound with ATP and a monomer bound with gefitinib may not dimerize. As mentioned in the main text, this symmetry requirement for dimerization was not enforced with respect to receptor ligand occupancy status due to specific experimental evidence for the formation of dimers bound with only a single ligand molecule (see additional discussion in *Methods*).

### *Phosphorylation*

Example:  $[(LAR)(LAR)] \rightarrow [(LRp)(LRp)]$

Compartments: surface and interior

Parameters:  $k_p$ ,  $k_{p,L}$

Rules: Phosphorylation occurs within receptor dimers bound with ATP that are not already phosphorylated. ATP bound to receptor dimers is consumed by this reaction.

### *Dephosphorylation*

Example:  $(LRp) \rightarrow (LR)$

Compartments: surface and interior

Parameters:  $k_{dp,s}$ ,  $k_{dp,i}$

Rules: Dephosphorylation occurs for receptor species that are phosphorylated and not bound by GRB2. This process occurs at different rates depending on whether the receptor species is localized to the cell surface or the cell interior.

### *GRB2 binding*

Example:  $G2 + Rp \leftrightarrow (G2Rp)$

Compartments: surface and interior

Parameters:  $k_{G2,f}$ ,  $k_{G2,r}$

Rules: GRB2 binds phosphorylated receptor species.

### *Internalization*

Example:  $(G2Rp)_s \rightarrow (G2Rp)_i$

Compartments: from surface to interior

Parameters:  $k_i$

Rules: Receptor species in the cell surface compartment bound by GRB2 are permitted to irreversibly internalize (translocate to the cell interior compartment).

*Receptor recycling*

Example:  $R_i \rightarrow R_s$

Compartments: from interior to surface

Parameters:  $k_x, f_{rE}, f_r$

Rules: All receptor species within the cell interior compartment recycle. Ligand-bound receptors recycle at a slower rate compared to receptors not bound by ligand.

*Receptor degradation*

Example:  $R_i \rightarrow 0$

Compartments: interior only

Parameters:  $k_x, (1-f_{rE}), (1-f_r)$

Rules: All receptor species within the cell interior compartment degrade. Ligand-bound receptors degrade at a faster rate compared to receptors not bound by ligand.

## Example Model Code

MATLAB functions necessary to simulate a simple EGF timecourse using our model framework:

```
function [] = main()

%constants
targetEGFR = 50000; %Berkers et al., 1991
targetKe = 0.13; %MJL HeLa.WT
keEGFconc = 0.00156; % 10 ng/mL

kadptonREF = 16; %1/uM/s (majority constant, Morimatsu et al., 2007)
AvNum = 6.0221415e23; %#/mol
um3toL = 1e-15; %cubic micro to liter conversion
micro = 1e-6;
Rcell = 10; %microns
Vcell = 4/3*pi*Rcell^3; %cubic microns
newVcell = Vcell*um3toL; %liters
kadpton = kadptonREF*60/newVcell/AvNum/micro; %#/cell
kadptoff = 7.6*60; %1/s (majority constant, Morimatsu et al., 2007)

Grb2REF = 0.085; %uM (Kholodenko et al., 1999)
adpt = Grb2REF*newVcell*micro*AvNum;

KDDimerREF = 6; %uM (Shan et al., Cell, 2012)
KDDimer = KDDimerREF*newVcell*micro*AvNum;

%parameter names
paramNames{1} = 'kegfon';
paramNames{2} = 'kegfoff';
paramNames{3} = 'kegfonint';
paramNames{4} = 'kegfoffint';
paramNames{5} = 'katpon';
paramNames{6} = 'katpoff';
paramNames{7} = 'kinhon';
paramNames{8} = 'kinhoff';
paramNames{9} = 'kceton';
paramNames{10} = 'kcetoff';
paramNames{11} = 'kadpton';
paramNames{12} = 'kadptoff';
paramNames{13} = 'kdimonSURF';
paramNames{14} = 'kdimonINT';
paramNames{15} = 'kdimoffNOEGF';
paramNames{16} = 'kdimoffEGF';
paramNames{17} = 'kcatNOEGF';
```

```

paramNames{18} = 'kcatEGF';
paramNames{19} = 'kdephosSURF';
paramNames{20} = 'kdephosINT';
paramNames{21} = 'kint';
paramNames{22} = 'kexit';
paramNames{23} = 'ATPconc';
paramNames{24} = 'frecoc';
paramNames{25} = 'frecunoc';
paramNames{26} = 'EGFconc';
paramNames{27} = 'INHconc';
paramNames{28} = 'CETconc';

```

```

% dimerization on-rates (calculated)
kdimonSURF = 6.7e-4;
kdimonINT = 2.7e-3;

```

```

% parameter values
paramVals(1) = 306; %kegfon MYERS (summarized in WATERS)
paramVals(2) = 0.8; %kegfoff fixed KD (KD from French et al.)
paramVals(3) = 3.1e-4; %kegfonint, 1/(#/endo * min)
paramVals(4) = 0.66; %kegfoffint
paramVals(5) = 1e5; %katpon (diffusion-limited)
paramVals(6) = 1.1e7; %katpoff, computed using steady-state model
paramVals(7) = 1e5; %kinhon (diffusion-limited)
paramVals(8) = 2.1e2; %computed using KD from Wakeling + Gibson, 2002
paramVals(9) = 13.2; %kceton
paramVals(10) = 0.066; %kcetoff
paramVals(11) = kadpton; %kadpton
paramVals(12) = kadptoff; %kadptoff
paramVals(13) = kdimonSURF; %kdimonSURF
paramVals(14) = kdimonINT; %kdimonINT
paramVals(15) = KDdimer*kdimonSURF; %kdimoffNOEGF
paramVals(16) = 1e-1; %kdimoffEGF (Hendriks)
paramVals(17) = 2.7; %kcatNOEGF
paramVals(18) = 13; %kcatEGF
paramVals(19) = NaN; %kdephosSURF
paramVals(20) = NaN; %kdephosINT
paramVals(21) = 0; %ke,model
paramVals(22) = 0.04; %kexit (Hendriks)
paramVals(23) = 1000; %ATPconc
paramVals(24) = 0.5; %frecoc (Hendriks)
paramVals(25) = 0.8; %frecunoc (Hendriks)
paramVals(26) = 0; %EGFconc
paramVals(27) = 0; %INHconc
paramVals(28) = 0; %CETconc

```

```

%compile base model
model = SBmodel('model.txt');
SBPDmakeMEXmodel(model,'mexmodel');
numStatesOutput = SBPDsimulate('mexmodel');
species = length(numStatesOutput.states);

%FITTED PARAMETERS
[tf,indexVec(1)] = ismember('kdephosSURF',paramNames);
[tf,indexVec(2)] = ismember('kdephosINT',paramNames);

paramVals(indexVec(1)) = 5.3e0;
paramVals(indexVec(2)) = 2.2e0;

timecourse(paramNames,paramVals,species,targetEGFR,targetKe,keEGFconc,adpt)

function [] =
timecourse(paramNames,paramVals,species,targetEGFR,targetKe,keEGFconc,adpt)

%expt parameters
STIMconc = 0.00156;
STIMtimeVec = 0:0.01:20;

%relevant indeces
output = SBPDsimulate('mexmodel');
[tf, indexVec(1)] = ismember('E',output.states(1,:));
[tf, indexVec(4)] = ismember('adpt',output.states(1,:));
[tf, indexVec(6)] = ismember('totpEGFRperc',output.variables(1,:));
[tf, indexVec(7)] = ismember('EGFconc',paramNames);

%initial conditions
initConds = zeros(species,1);
initConds(indexVec(1)) = targetEGFR;
initConds(indexVec(4)) = adpt;

%determine ke
errorKe = 1;
tolKe = 0;
while errorKe > tolKe
    [paramVals,errorKe,tolKe] =
correctKe(initConds,paramNames,paramVals,targetKe,keEGFconc);
    [initConds] = steadyStateNODEG(initConds,paramNames,paramVals);
    [keExpt,surfEGFint,intEGF,fity] = calcKe(initConds,paramNames,paramVals,keEGFconc);
    errorKe = abs(keExpt - targetKe);
end

% 10 ng/mL EGF timecourse

```



```

paramVals(indexVec(7)) = STIMconc;
EGF10ngmLoutput =
SBPDsimulate('mexmodel',STIMtimeVec,initConds,paramNames,paramVals);
for i = 1:1:length(STIMtimeVec)
    STIM10ngmLsim(i) = EGF10ngmLoutput.variablevalues(i,indexVec(6));
end
paramVals(indexVec(7)) = 0;

%plot results
figure
plot(STIMtimeVec,STIM10ngmLsim,'g','LineWidth',2)
xlabel('time (minutes)')
ylabel('pEGFR/EGFR (%)')

function [paramVals,error,tol] =
correctKe(initConds,paramNames,paramVals,targetKe,keEGFconc)

%gather required indeces
output = SBPDsimulate('mexmodel');
[tf, indexVec(1)] = ismember('kint', paramNames);
[tf, indexVec(2)] = ismember('surfEGF', output.variables(1,:));
[tf, indexVec(3)] = ismember('intEGF', output.variables(1,:));
[tf, indexVec(4)] = ismember('EGFconc', paramNames);

%ke guess
paramVals(indexVec(1)) = targetKe;

%tolerances
tol = targetKe/100;
error = tol*10;
deltaTime = 0.1;
timeVec = 0:deltaTime:7.5;

%set EGF
paramVals(indexVec(4)) = keEGFconc;

%iterate
while error > tol

    output = SBPDsimulate('mexmodel',timeVec,initConds,paramNames,paramVals);

    %first point
    surfEGFint(1) = output.variablevalues(1,indexVec(2));
    intEGF(1) = output.variablevalues(1,indexVec(3));

    %subsequent points

```

```

for i=2:1:length(timeVec)
    lastPoint = output.variablevalues(i-1,indexVec(2));
    currentPoint = output.variablevalues(i,indexVec(2));
    surfEGFint(i) = 0.5*(currentPoint + lastPoint)*deltaTime + surfEGFint(i-1);
    intEGF(i) = output.variablevalues(i,indexVec(3));
end

%fit data
p = polyfit(surfEGFint,intEGF,1);
keExpt = p(1);

%calculate error and generate new guess
error = abs(keExpt - targetKe);
kemodel = paramVals(indexVec(1));
newKe = kemodel/keExpt*targetKe;
paramVals(indexVec(1)) = newKe;
end

%return EGF conc to zero
paramVals(indexVec(4)) = 0;

function [initConds] = steadyStateNODEG(initConds,paramNames,paramVals)

[tf, indexVec(1)] = ismember('frecoc',paramNames);
[tf, indexVec(2)] = ismember('frecunoc',paramNames);
paramVals(indexVec(1)) = 1;
paramVals(indexVec(2)) = 1;

%steady state time
timeVec = 0:1e9:1e10;

output = SBPDsimulate('mexmodel',timeVec,initConds,paramNames,paramVals);

%extract new initial condition
for i=1:1:length(initConds)
    initConds(i) = output.statevalues(length(timeVec),i);
end

function [keExpt,surfEGFint,intEGF,fity] =
calcKe(initConds,paramNames,paramVals,keEGFconc)

%gather required indeces
output = SBPDsimulate('mexmodel');
[tf, indexVec(1)] = ismember('kint', paramNames);
[tf, indexVec(2)] = ismember('surfEGF', output.variables(1,:));
[tf, indexVec(3)] = ismember('intEGF', output.variables(1,:));

```

```

[tf, indexVec(4)] = ismember('EGFconc', paramNames);

%set EGF
paramVals(indexVec(4)) = keEGFconc;

%simulate EGF timecourse
deltaTime = 0.1;
timeVec = 0:deltaTime:7.5;
output = SBPDSimulate('mexmodel', timeVec, initConds, paramNames, paramVals);

%first point
surfEGFint(1) = output.variablevalues(1,indexVec(2));
intEGF(1) = output.variablevalues(1,indexVec(3));

%subsequent points
for i=2:1:length(timeVec)
    lastPoint = output.variablevalues(i-1,indexVec(2));
    currentPoint = output.variablevalues(i,indexVec(2));
    surfEGFint(i) = 0.5*(currentPoint + lastPoint)*deltaTime + surfEGFint(i-1);
    intEGF(i) = output.variablevalues(i,indexVec(3));
end

%fit data
p = polyfit(surfEGFint,intEGF,1);
keExpt = p(1);

%store fit
for k=1:1:length(timeVec)
    fity(k) = p(1)*surfEGFint(k)+p(2);
end

```

Model topology file (stored as a separate text file):

```

***** MODEL NAME

***** MODEL NOTES

***** MODEL STATE INFORMATION

***** MODEL PARAMETERS

%BINDING
kefon=0
kegfoff=0
kegfonint=0
kegfoffint=0
kceton=0
kcetoff=0

```

kcetonint=0  
kcetoffint=0  
katpon=0  
katpoff=0  
kinhon=0  
kinhoff=0  
kadpton=0  
kadptoff=0

% DIMERIZATION

kdimonSURF=0  
kdimonINT=0  
kdimoffNOEGF=0  
kdimoffEGF=0

% PHOSPHORYLATION

kcatNOEGF=0  
kcatEGF=0

% DEPHOSPHORYLATION

kdephosSURF=0  
kdephosINT=0

% TRAFFICKING

kint=0  
kexit=0  
frecoc=0  
frecunoc=0

% CONCENTRATIONS

ATPconc=0  
EGFconc=0  
INHconc=0  
CETconc=0

\*\*\*\*\* MODEL VARIABLES

totEGFR = E + EA + EI + ES + ESA + ESI + EP + EAP + EIP + ESP + ESAP + ESIP + 2\*EE +  
2\*EAEA + 2\*EIEI + 2\*ESE + 2\*ESAEA + 2\*ESIEI + 2\*ESES + 2\*ESAESA + 2\*ESIESI + 2\*EPEP +  
2\*EAPEAP + 2\*EIPEIP + 2\*ESPEP + 2\*ESAPEAP + 2\*ESIPEIP + 2\*ESPESP + 2\*ESAPESAP +  
2\*ESIPESIP + Eint + EAint + EIint + ESint + ESAint + ESint + EPint + EAPint + EIPint + ESPint +  
ESAPint + ESIPint + 2\*EEint + 2\*EAEAint + 2\*EIEIint + 2\*ESEint + 2\*ESAEAint + 2\*ESIEIint +  
2\*ESESint + 2\*ESAESAint + 2\*ESIESIint + 2\*EPEPint + 2\*EAPEAPint + 2\*EIPEIPint + 2\*ESPEPint  
+ 2\*ESAPEAPint + 2\*ESIPEIPint + 2\*ESPESPint + 2\*ESAPESAPint + 2\*ESIPESIPint + EPadpt +  
EAPadpt + EIPadpt + ESPadpt + ESAPadpt + ESIPadpt + 2\*EPEPadpt + 2\*EAPEAPadpt +  
2\*EIPEIPadpt + 2\*ESPEPadpt + 2\*ESAPEAPadpt + 2\*ESIPEIPadpt + 2\*ESPESPadpt +  
2\*ESAPESAPadpt + 2\*ESIPESIPadpt + EPadptint + EAPadptint + EIPadptint + ESPadptint +  
ESAPadptint + ESIPadptint + 2\*EPEPadptint + 2\*EAPEAPadptint + 2\*EIPEIPadptint + 2\*ESPEPadptint  
+ 2\*ESAPEAPadptint + 2\*ESIPEIPadptint + 2\*ESPESPadptint + 2\*ESAPESAPadptint +  
2\*ESIPESIPadptint + Ecet + EAcet + EIcet + EPcet + EAPcet + EIPcet + EPcetadpt + EAPcetadpt +

EIPcetadpt + Ecetint + EAcetint + Eicetint + EPcetint + EAPcetint + EIPcetint + EPcetadptint + EAPcetadptint + EIPcetadptint

totpEGFR = EP + EAP + EIP + ESP + ESAP + ESIP + 2\*EPEP + 2\*EAPEAP + 2\*EIPEIP + 2\*ESPEP + 2\*ESAPEAP + 2\*ESIPEIP + 2\*ESPESP + 2\*ESAPESAP + 2\*ESIPESIP + EPint + EAPint + EIPint + ESPint + ESAPint + ESIPint + 2\*EPEPint + 2\*EAPEAPint + 2\*EIPEIPint + 2\*ESPEPint + 2\*ESAPEAPint + 2\*ESIPEIPint + 2\*ESPESPint + 2\*ESAPESAPint + 2\*ESIPESIPint + EPadpt + EAPadpt + EIPadpt + ESPadpt + ESAPadpt + ESIPadpt + 2\*EPEPadpt + 2\*EAPEAPadpt + 2\*EIPEIPadpt + 2\*ESPEPadpt + 2\*ESAPEAPadpt + 2\*ESIPEIPadpt + 2\*ESPESPadpt + 2\*ESAPESAPadpt + 2\*ESIPESIPadpt + EPadptint + EAPadptint + EIPadptint + ESPadptint + ESAPadptint + ESIPadptint + 2\*EPEPadptint + 2\*EAPEAPadptint + 2\*EIPEIPadptint + 2\*ESPEPadptint + 2\*ESAPEAPadptint + 2\*ESIPEIPadptint + 2\*ESPESPadptint + 2\*ESAPESAPadptint + 2\*ESIPESIPadptint + EPcet + EAPcet + EIPcet + EPcetadpt + EAPcetadpt + EIPcetadpt + EPcetint + EAPcetint + EIPcetint + EPcetadptint + EAPcetadptint + EIPcetadptint

totpEGFRperc = totpEGFR/totEGFR\*100

surfpEGFR = EP + EAP + EIP + ESP + ESAP + ESIP + 2\*EPEP + 2\*EAPEAP + 2\*EIPEIP + 2\*ESPEP + 2\*ESAPEAP + 2\*ESIPEIP + 2\*ESPESP + 2\*ESAPESAP + 2\*ESIPESIP + EPadpt + EAPadpt + EIPadpt + ESPadpt + ESAPadpt + ESIPadpt + 2\*EPEPadpt + 2\*EAPEAPadpt + 2\*EIPEIPadpt + 2\*ESPEPadpt + 2\*ESAPEAPadpt + 2\*ESIPEIPadpt + 2\*ESPESPadpt + 2\*ESAPESAPadpt + 2\*ESIPESIPadpt + EPcet + EAPcet + EIPcet + EPcetadpt + EAPcetadpt + EIPcetadpt

surfpEGFRperc = surfpEGFR/totpEGFR\*100

intpEGFR = EPint + EAPint + EIPint + ESPint + ESAPint + ESIPint + 2\*EPEPint + 2\*EAPEAPint + 2\*EIPEIPint + 2\*ESPEPint + 2\*ESAPEAPint + 2\*ESIPEIPint + 2\*ESPESPint + 2\*ESAPESAPint + 2\*ESIPESIPint + EPadptint + EAPadptint + EIPadptint + ESPadptint + ESAPadptint + ESIPadptint + 2\*EPEPadptint + 2\*EAPEAPadptint + 2\*EIPEIPadptint + 2\*ESPEPadptint + 2\*ESAPEAPadptint + 2\*ESIPEIPadptint + 2\*ESPESPadptint + 2\*ESAPESAPadptint + 2\*ESIPESIPadptint + EPcetint + EAPcetint + EIPcetint + EPcetadptint + EAPcetadptint + EIPcetadptint

intpEGFRperc = intpEGFR/totpEGFR\*100

surfEGF = ES + ESA + ESI + ESP + ESAP + ESIP + ESE + ESAEA + ESIEI + 2\*ESES + 2\*ESAESA + 2\*ESIESI + ESPEP + ESAPEAP + ESIPEIP + 2\*ESPESP + 2\*ESAPESAP + 2\*ESIPESIP + ESPadpt + ESAPadpt + ESIPadpt + ESPEPadpt + ESAPEAPadpt + ESIPEIPadpt + 2\*ESPESPadpt + 2\*ESAPESAPadpt + 2\*ESIPESIPadpt

intEGF = Sint + debrisEGF + ESint + ESAint + ESInt + ESPint + ESAPint + ESIPint + ESEint + ESAEAint + ESIEInt + 2\*ESESint + 2\*ESAESAint + 2\*ESIESInt + ESPEPint + ESAPEAPint + ESIPEIPint + 2\*ESPESPint + 2\*ESAPESAPint + 2\*ESIPESIPint + ESPadptint + ESAPadptint + ESIPadptint + ESPEPadptint + ESAPEAPadptint + ESIPEIPadptint + 2\*ESPESPadptint + 2\*ESAPESAPadptint + 2\*ESIPESIPadptint

totEGFRsurf = E + EA + EI + ES + ESA + ESI + EP + EAP + EIP + ESP + ESAP + ESIP + 2\*EE + 2\*EAEA + 2\*EIEI + 2\*ESE + 2\*ESAEA + 2\*ESIEI + 2\*ESES + 2\*ESAESA + 2\*ESIESI + 2\*EPEP + 2\*EAPEAP + 2\*EIPEIP + 2\*ESPEP + 2\*ESAPEAP + 2\*ESIPEIP + 2\*ESPESP + 2\*ESAPESAP + 2\*ESIPESIP + EPadpt + EAPadpt + EIPadpt + ESPadpt + ESAPadpt + ESIPadpt + 2\*EPEPadpt + 2\*EAPEAPadpt + 2\*EIPEIPadpt + 2\*ESPEPadpt + 2\*ESAPEAPadpt + 2\*ESIPEIPadpt +

$$2*ESPESPadpt + 2*ESAPESAPadpt + 2*ESIPESIPadpt + Ecet + EAcet + EIcet + EPcet + EAPcet + EIPcet + EPcetadpt + EAPcetadpt + EIPcetadpt$$

$$totEGFRsurfperc = totEGFRsurf/totEGFR*100$$

$$totEGFRint = Eint + EAint + EIint + ESint + ESAint + ESInt + EPint + EAPint + EIPint + ESPint + ESAPint + ESIPint + 2*EEint + 2*EAEAint + 2*EIEIint + 2*ESEint + 2*ESAEAint + 2*ESIEIint + 2*ESESint + 2*ESAESAint + 2*ESIESInt + 2*EPEPint + 2*EAPEAPint + 2*EIPEIPint + 2*ESPEPint + 2*ESAPEAPint + 2*ESIPEIPint + 2*ESPESPint + 2*ESAPESAPint + 2*ESIPESIPint + EPadptint + EAPadptint + EIPadptint + ESPadptint + ESAPadptint + ESIPadptint + 2*EPEPadptint + 2*EAPEAPadptint + 2*EIPEIPadptint + 2*ESPEPadptint + 2*ESAPEAPadptint + 2*ESIPEIPadptint + 2*ESPESPadptint + 2*ESAPESAPadptint + 2*ESIPESIPadptint + Ecetint + EAcetint + EIcetint + EPcetint + EAPcetint + EIPcetint + EPcetadptint + EAPcetadptint + EIPcetadptint$$

$$totEGFRintperc = totEGFRint/totEGFR*100$$

$$surfDimers = 2*EE + 2*EAEA + 2*EIEI + 2*ESE + 2*ESAEA + 2*ESIEI + 2*ESES + 2*ESAESA + 2*ESIESI + 2*EPEP + 2*EAPEAP + 2*EIPEIP + 2*ESPEP + 2*ESAPEAP + 2*ESIPEIP + 2*ESPESP + 2*ESAPESAP + 2*ESIPESIP + 2*EPEPadpt + 2*EAPEAPadpt + 2*EIPEIPadpt + 2*ESPEPadpt + 2*ESAPEAPadpt + 2*ESIPEIPadpt + 2*ESPESPadpt + 2*ESAPESAPadpt + 2*ESIPESIPadpt$$

$$surfDimersPerc = surfDimers/totEGFR*100$$

$$intDimers = 2*EEint + 2*EAEAint + 2*EIEIint + 2*ESEint + 2*ESAEAint + 2*ESIEIint + 2*ESESint + 2*ESAESAint + 2*ESIESInt + 2*EPEPint + 2*EAPEAPint + 2*EIPEIPint + 2*ESPEPint + 2*ESAPEAPint + 2*ESIPEIPint + 2*ESPESPint + 2*ESAPESAPint + 2*ESIPESIPint + 2*EPEPadptint + 2*EAPEAPadptint + 2*EIPEIPadptint + 2*ESPEPadptint + 2*ESAPEAPadptint + 2*ESIPEIPadptint + 2*ESPESPadptint + 2*ESAPESAPadptint + 2*ESIPESIPadptint$$

$$intDimersPerc = intDimers/totEGFR*100$$

$$totAdpt = adpt + EPadpt + EAPadpt + EIPadpt + ESPadpt + ESAPadpt + ESIPadpt + 2*EPEPadpt + 2*EAPEAPadpt + 2*EIPEIPadpt + 2*ESPEPadpt + 2*ESAPEAPadpt + 2*ESIPEIPadpt + 2*ESPESPadpt + 2*ESAPESAPadpt + 2*ESIPESIPadpt + EPadptint + EAPadptint + EIPadptint + ESPadptint + ESAPadptint + ESIPadptint + 2*EPEPadptint + 2*EAPEAPadptint + 2*EIPEIPadptint + 2*ESPEPadptint + 2*ESAPEAPadptint + 2*ESIPEIPadptint + 2*ESPESPadptint + 2*ESAPESAPadptint + 2*ESIPESIPadptint + EPcetadpt + EAPcetadpt + EIPcetadpt + EPcetadptint + EAPcetadptint + EIPcetadptint$$

$$totAdptBound = EPadpt + EAPadpt + EIPadpt + ESPadpt + ESAPadpt + ESIPadpt + 2*EPEPadpt + 2*EAPEAPadpt + 2*EIPEIPadpt + 2*ESPEPadpt + 2*ESAPEAPadpt + 2*ESIPEIPadpt + 2*ESPESPadpt + 2*ESAPESAPadpt + 2*ESIPESIPadpt + EPadptint + EAPadptint + EIPadptint + ESPadptint + ESAPadptint + ESIPadptint + 2*EPEPadptint + 2*EAPEAPadptint + 2*EIPEIPadptint + 2*ESPEPadptint + 2*ESAPEAPadptint + 2*ESIPEIPadptint + 2*ESPESPadptint + 2*ESAPESAPadptint + 2*ESIPESIPadptint + EPcetadpt + EAPcetadpt + EIPcetadpt + EPcetadptint + EAPcetadptint + EIPcetadptint$$

$$totAdptperc = totAdptBound/totEGFR*100$$

$$\text{surfAdpt} = \text{EPadpt} + \text{EAPadpt} + \text{EIPadpt} + \text{ESPadpt} + \text{ESAPadpt} + \text{ESIPadpt} + 2*\text{EPEPadpt} + 2*\text{EAPEAPadpt} + 2*\text{EIPEIPadpt} + 2*\text{ESPEPadpt} + 2*\text{ESAPEAPadpt} + 2*\text{ESIPEIPadpt} + 2*\text{ESPESPadpt} + 2*\text{ESAPESAPadpt} + 2*\text{ESIPESIPadpt} + \text{EPcetadpt} + \text{EAPcetadpt} + \text{EIPcetadpt}$$

$$\text{surfAdptperc} = \text{surfAdpt}/\text{totEGFR}*100$$

$$\text{intAdpt} = \text{EPadptint} + \text{EAPadptint} + \text{EIPadptint} + \text{ESPadptint} + \text{ESAPadptint} + \text{ESIPadptint} + 2*\text{EPEPadptint} + 2*\text{EAPEAPadptint} + 2*\text{EIPEIPadptint} + 2*\text{ESPEPadptint} + 2*\text{ESAPEAPadptint} + 2*\text{ESIPEIPadptint} + 2*\text{ESPESPadptint} + 2*\text{ESAPESAPadptint} + 2*\text{ESIPESIPadptint} + \text{EPcetadptint} + \text{EAPcetadptint} + \text{EIPcetadptint}$$

$$\text{intAdptperc} = \text{intAdpt}/\text{totEGFR}*100$$

$$\text{occEGFR} = \text{ES} + \text{ESA} + \text{ESI} + \text{ESP} + \text{ESAP} + \text{ESIP} + \text{ESE} + \text{ESAEA} + \text{ESIEI} + 2*\text{ESES} + 2*\text{ESAESA} + 2*\text{ESIESI} + \text{ESPEP} + \text{ESAPEAP} + \text{ESIPEIP} + 2*\text{ESPESP} + 2*\text{ESAPESAP} + 2*\text{ESIPESIP} + \text{ESint} + \text{ESAint} + \text{ESlint} + \text{ESPint} + \text{ESAPint} + \text{ESIPint} + \text{ESEint} + \text{ESAEAint} + \text{ESIEIint} + 2*\text{ESESint} + 2*\text{ESAESAint} + 2*\text{ESIESIint} + \text{ESPEPint} + \text{ESAPEAPint} + \text{ESIPEIPint} + 2*\text{ESPESPint} + 2*\text{ESAPESAPint} + 2*\text{ESIPESIPint} + \text{ESPadpt} + \text{ESAPadpt} + \text{ESIPadpt} + \text{ESPEPadpt} + \text{ESAPEAPadpt} + \text{ESIPEIPadpt} + 2*\text{ESPESPadpt} + 2*\text{ESAPESAPadpt} + 2*\text{ESIPESIPadpt} + \text{ESPadptint} + \text{ESAPadptint} + \text{ESIPadptint} + \text{ESPEPadptint} + \text{ESAPEAPadptint} + \text{ESIPEIPadptint} + 2*\text{ESPESPadptint} + 2*\text{ESAPESAPadptint} + 2*\text{ESIPESIPadptint}$$

$$\text{phosMonomer} = \text{EP} + \text{EAP} + \text{EIP} + \text{ESP} + \text{ESAP} + \text{ESIP} + \text{EPint} + \text{EAPint} + \text{EIPint} + \text{ESPint} + \text{ESAPint} + \text{ESIPint} + \text{EPadpt} + \text{EAPadpt} + \text{EIPadpt} + \text{ESPadpt} + \text{ESAPadpt} + \text{ESIPadpt} + \text{EPadptint} + \text{EAPadptint} + \text{EIPadptint} + \text{ESPadptint} + \text{ESAPadptint} + \text{ESIPadptint} + \text{EPcet} + \text{EAPcet} + \text{EIPcet} + \text{EPcetadpt} + \text{EAPcetadpt} + \text{EIPcetadpt} + \text{EPcetint} + \text{EAPcetint} + \text{EIPcetint} + \text{EPcetadptint} + \text{EAPcetadptint} + \text{EIPcetadptint}$$

$$\text{occMon} = \text{ES} + \text{ESA} + \text{ESI} + \text{ESP} + \text{ESAP} + \text{ESIP} + \text{ESint} + \text{ESAint} + \text{ESlint} + \text{ESPint} + \text{ESAPint} + \text{ESIPint} + \text{ESPadpt} + \text{ESAPadpt} + \text{ESIPadpt} + \text{ESPadptint} + \text{ESAPadptint} + \text{ESIPadptint}$$

$$\text{occDim} = 2*\text{ESE} + 2*\text{ESAEA} + 2*\text{ESIEI} + 2*\text{ESES} + 2*\text{ESAESA} + 2*\text{ESIESI} + 2*\text{ESPEP} + 2*\text{ESAPEAP} + 2*\text{ESIPEIP} + 2*\text{ESPESP} + 2*\text{ESAPESAP} + 2*\text{ESIPESIP} + 2*\text{ESEint} + 2*\text{ESAEAint} + 2*\text{ESIEIint} + 2*\text{ESESint} + 2*\text{ESAESAint} + 2*\text{ESIESIint} + 2*\text{ESPEPint} + 2*\text{ESAPEAPint} + 2*\text{ESIPEIPint} + 2*\text{ESPESPint} + 2*\text{ESAPESAPint} + 2*\text{ESIPESIPint} + 2*\text{ESPEPadpt} + 2*\text{ESAPEAPadpt} + 2*\text{ESIPEIPadpt} + 2*\text{ESPESPadpt} + 2*\text{ESAPESAPadpt} + 2*\text{ESIPESIPadpt} + 2*\text{ESPEPadptint} + 2*\text{ESAPEAPadptint} + 2*\text{ESIPEIPadptint} + 2*\text{ESPESPadptint} + 2*\text{ESAPESAPadptint} + 2*\text{ESIPESIPadptint}$$

$$\text{unoccMon} = \text{E} + \text{EA} + \text{EI} + \text{EP} + \text{EAP} + \text{EIP} + \text{Eint} + \text{EAint} + \text{EIint} + \text{EPint} + \text{EAPint} + \text{EIPint} + \text{EPadpt} + \text{EAPadpt} + \text{EIPadpt} + \text{EPadptint} + \text{EAPadptint} + \text{EIPadptint} + \text{Ecet} + \text{EAcet} + \text{EIcet} + \text{EPcet} + \text{EAPcet} + \text{EIPcet} + \text{EPcetadpt} + \text{EAPcetadpt} + \text{EIPcetadpt} + \text{Ecetint} + \text{EAcetint} + \text{EIcetint} + \text{EPcetint} + \text{EAPcetint} + \text{EIPcetint} + \text{EPcetadptint} + \text{EAPcetadptint} + \text{EIPcetadptint}$$

$$\text{unoccDim} = 2*\text{EE} + 2*\text{EAEA} + 2*\text{EIEI} + 2*\text{EPEP} + 2*\text{EAPEAP} + 2*\text{EIPEIP} + 2*\text{EEint} + 2*\text{EAEAint} + 2*\text{EIEIint} + 2*\text{EPEPint} + 2*\text{EAPEAPint} + 2*\text{EIPEIPint} + 2*\text{EPEPadpt} + 2*\text{EAPEAPadpt} + 2*\text{EIPEIPadpt} + 2*\text{EPEPadptint} + 2*\text{EAPEAPadptint} + 2*\text{EIPEIPadptint}$$

\*\*\*\*\* MODEL REACTIONS

%CETUXIMAB BINDING

E<=>Ecet : Cetuximab Binding Surface 1

vf=kceton\*CETconc\*E

vr=kcetoff\*Ecet

EA<=>EAcet : Cetuximab Binding Surface 2

vf=kceton\*CETconc\*EA

vr=kcetoff\*EAcet

EI<=>EIcet : Cetuximab Binding Surface 3

vf=kceton\*CETconc\*EI

vr=kcetoff\*EIcet

EP<=>EPcet : Cetuximab Binding Surface 4

vf=kceton\*CETconc\*EP

vr=kcetoff\*EPcet

EAP<=>EAPcet : Cetuximab Binding Surface 5

vf=kceton\*CETconc\*EAP

vr=kcetoff\*EAPcet

EIP<=>EIPcet : Cetuximab Binding Surface 6

vf=kceton\*CETconc\*EIP

vr=kcetoff\*EIPcet

EPadpt<=>EPcetadpt : Cetuximab Binding Surface 13

vf=kceton\*CETconc\*EPadpt

vr=kcetoff\*EPcetadpt

EAPadpt<=>EAPcetadpt : Cetuximab Binding Surface 14

vf=kceton\*CETconc\*EAPadpt

vr=kcetoff\*EAPcetadpt

EIPadpt<=>EIPcetadpt : Cetuximab Binding Surface 15

vf=kceton\*CETconc\*EIPadpt

vr=kcetoff\*EIPcetadpt

%ATP BINDING TO MONOMERS AT THE SURFACE

E<=>EA : Monomer ATP Binding 1

vf=katpon\*ATPconc\*E

vr=katpoff\*EA

ES<=>ESA : Monomer ATP Binding 2

vf=katpon\*ATPconc\*ES

vr=katpoff\*ESA

EP<=>EAP : Monomer ATP Binding 3

vf=katpon\*EP\*ATPconc

vr=katpoff\*EAP



ESP<=>ESAP : Monomer ATP Binding 4  
vf=katpon\*ESP\*ATPconc  
vr=katpoff\*ESAP

EPadpt<=>EAPadpt : Monomer ATP Binding 9  
vf=katpon\*EPadpt\*ATPconc  
vr=katpoff\*EAPadpt

ESPadpt<=>ESAPadpt : Monomer ATP Binding 10  
vf=katpon\*ESPadpt\*ATPconc  
vr=katpoff\*ESAPadpt

Ecet<=>EAcet : Monomer ATP Binding 13  
vf=katpon\*ATPconc\*Ecet  
vr=katpoff\*EAcet

EPcet<=>EAPcet : Monomer ATP Binding 14  
vf=katpon\*ATPconc\*EPcet  
vr=katpoff\*EAPcet

EPcetadpt<=>EAPcetadpt : Monomer ATP Binding 17  
vf=katpon\*ATPconc\*EPcetadpt  
vr=katpoff\*EAPcetadpt

#### %INH BINDING TO MONOMERS AT THE SURFACE

E<=>EI : Monomer Inhibitor Binding 1  
vf=kinhon\*E\*INHconc  
vr=kinhoff\*EI

ES<=>ESI : Monomer Inhibitor Binding 2  
vf=kinhon\*ES\*INHconc  
vr=kinhoff\*ESI

EP<=>EIP : Monomer Inhibitor Binding 3  
vf=kinhon\*EP\*INHconc  
vr=kinhoff\*EIP

ESP<=>ESIP : Monomer Inhibitor Binding 4  
vf=kinhon\*ESP\*INHconc  
vr=kinhoff\*ESIP

EPadpt<=>EIPadpt : Monomer Inhibitor Binding 9  
vf=kinhon\*EPadpt\*INHconc  
vr=kinhoff\*EIPadpt

ESPadpt<=>ESIPadpt : Monomer Inhibitor Binding 10  
vf=kinhon\*ESPadpt\*INHconc  
vr=kinhoff\*ESIPadpt

Ecet<=>EIcet : Monomer Inhibitor Binding 13

vf=kinhon\*INHconc\*Ecet  
vr=kinhoff\*EIcet

EPcet<=>EIPcet : Monomer Inhibitor Binding 14

vf=kinhon\*INHconc\*EPcet  
vr=kinhoff\*EIPcet

EPcetadpt<=>EIPcetadpt : Monomer Inhibitor Binding 17

vf=kinhon\*INHconc\*EPcetadpt  
vr=kinhoff\*EIPcetadpt

## %LIGAND BINDING TO MONOMERS AT THE SURFACE

E<=>ES : Monomer EGF Binding 1

vf=kegfon\*EGFconc\*E  
vr=kegfoff\*ES

EA<=>ESA : Monomer EGF Binding 2

vf=kegfon\*EGFconc\*EA  
vr=kegfoff\*ESA

EI<=>ESI : Monomer EGF Binding 3

vf=kegfon\*EGFconc\*EI  
vr=kegfoff\*ESI

EP<=>ESP : Monomer EGF Binding 4

vf=kegfon\*EGFconc\*EP  
vr=kegfoff\*ESP

EAP<=>ESAP : Monomer EGF Binding 5

vf=kegfon\*EGFconc\*EAP  
vr=kegfoff\*ESAP

EIP<=>ESIP : Monomer EGF Binding 6

vf=kegfon\*EGFconc\*EIP  
vr=kegfoff\*ESIP

EPadpt<=>ESPadpt : Monomer EGF Binding 13

vf=kegfon\*EGFconc\*EPadpt  
vr=kegfoff\*ESPadpt

EAPadpt<=>ESAPadpt : Monomer EGF Binding 14

vf=kegfon\*EGFconc\*EAPadpt  
vr=kegfoff\*ESAPadpt

EIPadpt<=>ESIPadpt : Monomer EGF Binding 15

vf=kegfon\*EGFconc\*EIPadpt  
vr=kegfoff\*ESIPadpt

## %DIMERIZATION IN THE ABSENSE OF EGF AT THE SURFACE

E+E<=>EE : Dimerization no EGF 1  
vf=kdimonSURF\*E\*E  
vr=kdimoffNOEGF\*EE

EA+EA<=>EAEA : Dimerization no EGF 2  
vf=kdimonSURF\*EA\*EA  
vr=kdimoffNOEGF\*EAEA

EI+EI<=>EIEI : Dimerization no EGF 3  
vf=kdimonSURF\*EI\*EI  
vr=kdimoffNOEGF\*EIEI

EP+EP<=>EPEP : Dimerization no EGF 4  
vf=kdimonSURF\*EP\*EP  
vr=kdimoffNOEGF\*EPEP

EAP+EAP<=>EAPEAP : Dimerization no EGF 5  
vf=kdimonSURF\*EAP\*EAP  
vr=kdimoffNOEGF\*EAPEAP

EIP+EIP<=>EIPEIP : Dimerization no EGF 6  
vf=kdimonSURF\*EIP\*EIP  
vr=kdimoffNOEGF\*EIPEIP

EPadpt+EPadpt<=>EPEPadpt : Dimerization no EGF 13  
vf=kdimonSURF\*EPadpt\*EPadpt  
vr=kdimoffNOEGF\*EPEPadpt

EAPadpt+EAPadpt<=>EAPEAPadpt : Dimerization no EGF 14  
vf=kdimonSURF\*EAPadpt\*EAPadpt  
vr=kdimoffNOEGF\*EAPEAPadpt

EIPadpt+EIPadpt<=>EIPEIPadpt : Dimerization no EGF 15  
vf=kdimonSURF\*EIPadpt\*EIPadpt  
vr=kdimoffNOEGF\*EIPEIPadpt

#### % ASSYMETRIC DIMERIZATION AT THE SURFACE

ES+E<=>ESE : Surface Dimerization Assymmetric 1  
vf=kdimonSURF\*ES\*E  
vr=kdimoffEGF\*ESE

ESA+EA<=>ESAEA : Surface Dimerization Assymmetric 2  
vf=kdimonSURF\*ESA\*EA  
vr=kdimoffEGF\*ESAEA

ESI+EI<=>ESIEI : Surface Dimerization Assymmetric 3  
vf=kdimonSURF\*ESI\*EI  
vr=kdimoffEGF\*ESIEI

ESP+EP<=>ESPEP : Surface Dimerization Assymmetric 4

vf=kdimonSURF\*ESP\*EP  
vr=kdimoffEGF\*ESPEP

ESAP+EAP<=>ESAPEAP : Surface Dimerization Assymmetric 5  
vf=kdimonSURF\*ESAP\*EAP  
vr=kdimoffEGF\*ESAPEAP

ESIP+EIP<=>ESIPEIP : Surface Dimerization Assymmetric 6  
vf=kdimonSURF\*ESIP\*EIP  
vr=kdimoffEGF\*ESIPEIP

ESPadpt+EPadpt<=>ESPEPadpt : Surface Dimerization Assymmetric 13  
vf=kdimonSURF\*ESPadpt\*EPadpt  
vr=kdimoffEGF\*ESPEPadpt

ESAPadpt+EAPadpt<=>ESAPEAPadpt : Surface Dimerization Assymmetric 14  
vf=kdimonSURF\*ESAPadpt\*EAPadpt  
vr=kdimoffEGF\*ESAPEAPadpt

ESIPadpt+EIPadpt<=>ESIPEIPadpt : Surface Dimerization Assymmetric 15  
vf=kdimonSURF\*ESIPadpt\*EIPadpt  
vr=kdimoffEGF\*ESIPEIPadpt

%DIMERIZATION IN THE PRESENCE OF EGF AT THE SURFACE

ES+ES<=>ESES : Dimerization EGF 1  
vf=kdimonSURF\*ES\*ES  
vr=kdimoffEGF\*ESES

ESA+ESA<=>ESAESA : Dimerization EGF 2  
vf=kdimonSURF\*ESA\*ESA  
vr=kdimoffEGF\*ESAESA

ESI+ESI<=>ESIESI : Dimerization EGF 3  
vf=kdimonSURF\*ESI\*ESI  
vr=kdimoffEGF\*ESIESI

ESP+ESP<=>ESPESP : Dimerization EGF 4  
vf=kdimonSURF\*ESP\*ESP  
vr=kdimoffEGF\*ESPESP

ESAP+ESAP<=>ESAPESAP : Dimerization EGF 5  
vf=kdimonSURF\*ESAP\*ESAP  
vr=kdimoffEGF\*ESAPESAP

ESIP+ESIP<=>ESIPESIP : Dimerization EGF 6  
vf=kdimonSURF\*ESIP\*ESIP  
vr=kdimoffEGF\*ESIPESIP

ESPadpt+ESPadpt<=>ESPESPadpt : Dimerization EGF 13  
vf=kdimonSURF\*ESPadpt\*ESPadpt

vr=kdimoffEGF\*ESPESPadpt

ESAPadpt+ESAPadpt<=>ESAPESAPadpt : Dimerization EGF 14

vf=kdimonSURF\*ESAPadpt\*ESAPadpt

vr=kdimoffEGF\*ESAPESAPadpt

ESIPadpt+ESIPadpt<=>ESIPESIPadpt : Dimerization EGF 15

vf=kdimonSURF\*ESIPadpt\*ESIPadpt

vr=kdimoffEGF\*ESIPESIPadpt

%DIMER ATP BINDING AT THE SURFACE

EE<=>EAEA : Dimer ATP Binding 1

vf=katpon\*EE\*ATPconc

vr=katpoff\*EAEA

ESE<=>ESAEA : Dimer ATP Binding 2

vf=katpon\*ESE\*ATPconc

vr=katpoff\*ESAEA

ESES<=>ESAESA : Dimer ATP Binding 3

vf=katpon\*ESES\*ATPconc

vr=katpoff\*ESAESA

EPEP<=>EAPEAP : Dimer ATP Binding 4

vf=katpon\*EPEP\*ATPconc

vr=katpoff\*EAPEAP

ESPEP<=>ESAPEAP : Dimer ATP Binding 5

vf=katpon\*ESPEP\*ATPconc

vr=katpoff\*ESAPEAP

ESPESP<=>ESAPESAP : Dimer ATP Binding 6

vf=katpon\*ESPESP\*ATPconc

vr=katpoff\*ESAPESAP

EPEPadpt<=>EAPEAPadpt : Dimer ATP Binding 13

vf=katpon\*EPEPadpt\*ATPconc

vr=katpoff\*EAPEAPadpt

ESPEPadpt<=>ESAPEAPadpt : Dimer ATP Binding 14

vf=katpon\*ESPEPadpt\*ATPconc

vr=katpoff\*ESAPEAPadpt

ESPESPadpt<=>ESAPESAPadpt : Dimer ATP Binding 15

vf=katpon\*ESPESPadpt\*ATPconc

vr=katpoff\*ESAPESAPadpt

%DIMER INH BINDING AT THE SURFACE

EE<=>EIEI : Dimer INH Binding 1

vf=kinhon\*EE\*INHconc  
vr=kinhoff\*EIEI

ESE<=>ESIEI : Dimer INH Binding 2  
vf=kinhon\*ESE\*INHconc  
vr=kinhoff\*ESIEI

ESES<=>ESIESI : Dimer INH Binding 3  
vf=kinhon\*ESES\*INHconc  
vr=kinhoff\*ESIESI

EPEP<=>EPIPEIP : Dimer INH Binding 4  
vf=kinhon\*EPEP\*INHconc  
vr=kinhoff\*EPIPEIP

ESPEP<=>ESIPEIP : Dimer INH Binding 5  
vf=kinhon\*ESPEP\*INHconc  
vr=kinhoff\*ESIPEIP

ESPESP<=>ESIPESIP : Dimer INH Binding 6  
vf=kinhon\*ESPESP\*INHconc  
vr=kinhoff\*ESIPESIP

EPEPadpt<=>EPIPEAdpt : Dimer INH Binding 13  
vf=kinhon\*EPEPadpt\*INHconc  
vr=kinhoff\*EPIPEAdpt

ESPEPadpt<=>ESIPEAdpt : Dimer INH Binding 14  
vf=kinhon\*ESPEPadpt\*INHconc  
vr=kinhoff\*ESIPEAdpt

ESPESPadpt<=>ESIPESIPadpt : Dimer INH Binding 15  
vf=kinhon\*ESPESPadpt\*INHconc  
vr=kinhoff\*ESIPESIPadpt

%DIMER EGF BINDING AT THE SURFACE

EE<=>ESE : Dimer EGF Binding 1  
vf=2\*kegfon\*EGFconc\*EE  
vr=kegfoff\*ESE

ESE<=>ESES : Dimer EGF Binding 2  
vf=kegfon\*EGFconc\*ESE  
vr=kegfoff\*ESES

EAEA<=>ESAEA : Dimer EGF Binding 3  
vf=2\*kegfon\*EGFconc\*EAEA  
vr=kegfoff\*ESAEA

ESAEA<=>ESAESA : Dimer EGF Binding 4  
vf=kegfon\*EGFconc\*ESAEA

$vr=kegfoff*ESAESA$

EIEI $\rightleftharpoons$ ESIEI : Dimer EGF Binding 5  
 $vf=2*kegfon*EGFconc*EIEI$   
 $vr=kegfoff*ESIEI$

ESIEI $\rightleftharpoons$ ESIESI : Dimer EGF Binding 6  
 $vf=kegfon*EGFconc*ESIEI$   
 $vr=kegfoff*ESIESI$

EPEP $\rightleftharpoons$ ESPEP : Dimer EGF Binding 7  
 $vf=2*kegfon*EGFconc*EPEP$   
 $vr=kegfoff*ESPEP$

ESPEP $\rightleftharpoons$ ESPESP : Dimer EGF Binding 8  
 $vf=kegfon*EGFconc*ESPEP$   
 $vr=kegfoff*ESPESP$

EAPEAP $\rightleftharpoons$ ESAPEAP : Dimer EGF Binding 9  
 $vf=2*kegfon*EGFconc*EAPEAP$   
 $vr=kegfoff*ESAPEAP$

ESAPEAP $\rightleftharpoons$ ESAPESAP : Dimer EGF Binding 10  
 $vf=kegfon*EGFconc*ESAPEAP$   
 $vr=kegfoff*ESAPESAP$

EIPEIP $\rightleftharpoons$ ESIPEIP : Dimer EGF Binding 11  
 $vf=2*kegfon*EGFconc*EIPEIP$   
 $vr=kegfoff*ESIPEIP$

ESIPEIP $\rightleftharpoons$ ESIPESIP : Dimer EGF Binding 12  
 $vf=kegfon*EGFconc*ESIPEIP$   
 $vr=kegfoff*ESIPESIP$

EPEPadpt $\rightleftharpoons$ ESPEPadpt : Dimer EGF Binding 25  
 $vf=2*kegfon*EGFconc*EPEPadpt$   
 $vr=kegfoff*ESPEPadpt$

ESPEPadpt $\rightleftharpoons$ ESPESPadpt : Dimer EGF Binding 26  
 $vf=kegfon*EGFconc*ESPEPadpt$   
 $vr=kegfoff*ESPESPadpt$

EAPEAPadpt $\rightleftharpoons$ ESAPEAPadpt : Dimer EGF Binding 27  
 $vf=2*kegfon*EGFconc*EAPEAPadpt$   
 $vr=kegfoff*ESAPEAPadpt$

ESAPEAPadpt $\rightleftharpoons$ ESAPESAPadpt : Dimer EGF Binding 28  
 $vf=kegfon*EGFconc*ESAPEAPadpt$   
 $vr=kegfoff*ESAPESAPadpt$

EIPEIPadpt $\rightleftharpoons$ ESIPEIPadpt : Dimer EGF Binding 29

$vf=2*kegfon*EGFconc*EIPEIPadpt$   
 $vr=kegfoff*ESIPEIPadpt$

ESIPEIPadpt<=>ESIPESIPadpt : Dimer EGF Binding 30  
 $vf=kegfon*EGFconc*ESIPEIPadpt$   
 $vr=kegfoff*ESIPESIPadpt$

#### %PHOSPHORYLATION AT THE SURFACE

EAEA=>EPEP : Phosphorylation 1  
 $vf=kcatNOEGF*EAEA$

ESAEA=>ESPEP : Phosphorylation 2  
 $vf=kcatEGF*ESAEA$

ESAESA=>ESPESP : Phosphorylation 3  
 $vf=kcatEGF*ESAESA$

#### %DEPHOSPHORYLATION AT THE SURFACE

EP=>E : Dephosphorylation 1  
 $vf=kdephosSURF*EP$

EAP=>EA : Dephosphorylation 2  
 $vf=kdephosSURF*EAP$

EIP=>EI : Dephosphorylation 3  
 $vf=kdephosSURF*EIP$

ESP=>ES : Dephosphorylation 4  
 $vf=kdephosSURF*ESP$

ESAP=>ESA : Dephosphorylation 5  
 $vf=kdephosSURF*ESAP$

ESIP=>ESI : Dephosphorylation 6  
 $vf=kdephosSURF*ESIP$

EPEP=>EE : Dephosphorylation 7  
 $vf=kdephosSURF*EPEP$

EAPEAP=>EAEA : Dephosphorylation 8  
 $vf=kdephosSURF*EAPEAP$

EIPEIP=>EIEI : Dephosphorylation 9  
 $vf=kdephosSURF*EIPEIP$

ESPEP=>ESE : Dephosphorylation 10  
 $vf=kdephosSURF*ESPEP$



ESAPEAP=>ESAEA : Dephosphorylation 11  
vf=kdephosSURF\*ESAPEAP

ESIPEIP=>ESIEI : Dephosphorylation 12  
vf=kdephosSURF\*ESIPEIP

ESPESP=>ESES : Dephosphorylation 13  
vf=kdephosSURF\*ESPESP

ESAPESAP=>ESAESA : Dephosphorylation 14  
vf=kdephosSURF\*ESAPESAP

ESIPESIP=>ESIESI : Dephosphorylation 15  
vf=kdephosSURF\*ESIPESIP

EPcet=>Ecet : Dephosphorylation 31  
vf=kdephosSURF\*EPcet

EAPcet=>EAcet : Dephosphorylation 32  
vf=kdephosSURF\*EAPcet

EIPcet=>EIcet : Dephosphorylation 33  
vf=kdephosSURF\*EIPcet

%ADAPTER BINDING AT THE SURFACE

EP+adpt<=>EPadpt : Surface Adapter Binding 1  
vf=kadpton\*EP\*adpt  
vr=kadptoff\*EPadpt

EAP+adpt<=>EAPadpt : Surface Adapter Binding 2  
vf=kadpton\*EAP\*adpt  
vr=kadptoff\*EAPadpt

EIP+adpt<=>EIPadpt : Surface Adapter Binding 3  
vf=kadpton\*EIP\*adpt  
vr=kadptoff\*EIPadpt

ESP+adpt<=>ESPadpt : Surface Adapter Binding 4  
vf=kadpton\*ESP\*adpt  
vr=kadptoff\*ESPadpt

ESAP+adpt<=>ESAPadpt : Surface Adapter Binding 5  
vf=kadpton\*ESAP\*adpt  
vr=kadptoff\*ESAPadpt

ESIP+adpt<=>ESIPadpt : Surface Adapter Binding 6  
vf=kadpton\*ESIP\*adpt  
vr=kadptoff\*ESIPadpt

EPEP+2\*adpt<=>EPEPadpt : Surface Adapter Binding 7

vf=kadpton\*EPEP\*adpt  
vr=kadptoff\*EPEPadpt

EAPEAP+2\*adpt<=>EAPEAPadpt : Surface Adapter Binding 8  
vf=kadpton\*EAPEAP\*adpt  
vr=kadptoff\*EAPEAPadpt

EIPEIP+2\*adpt<=>EIPEIPadpt : Surface Adapter Binding 9  
vf=kadpton\*EIPEIP\*adpt  
vr=kadptoff\*EIPEIPadpt

ESPEP+2\*adpt<=>ESPEPadpt : Surface Adapter Binding 10  
vf=kadpton\*ESPEP\*adpt  
vr=kadptoff\*ESPEPadpt

ESAPEAP+2\*adpt<=>ESAPEAPadpt : Surface Adapter Binding 11  
vf=kadpton\*ESAPEAP\*adpt  
vr=kadptoff\*ESAPEAPadpt

ESIPEIP+2\*adpt<=>ESIPEIPadpt : Surface Adapter Binding 12  
vf=kadpton\*ESIPEIP\*adpt  
vr=kadptoff\*ESIPEIPadpt

ESPESP+2\*adpt<=>ESPESPadpt : Surface Adapter Binding 13  
vf=kadpton\*ESPESP\*adpt  
vr=kadptoff\*ESPESPadpt

ESAPESAP+2\*adpt<=>ESAPESAPadpt : Surface Adapter Binding 14  
vf=kadpton\*ESAPESAP\*adpt  
vr=kadptoff\*ESAPESAPadpt

ESIPESIP+2\*adpt<=>ESIPESIPadpt : Surface Adapter Binding 15  
vf=kadpton\*ESIPESIP\*adpt  
vr=kadptoff\*ESIPESIPadpt

EPcet+adpt<=>EPcetadpt : Surface Adapter Binding 31  
vf=kadpton\*EPcet\*adpt  
vr=kadptoff\*EPcetadpt

EAPcet+adpt<=>EAPcetadpt : Surface Adapter Binding 32  
vf=kadpton\*EAPcet\*adpt  
vr=kadptoff\*EAPcetadpt

EIPcet+adpt<=>EIPcetadpt : Surface Adapter Binding 33  
vf=kadpton\*EIPcet\*adpt  
vr=kadptoff\*EIPcetadpt

%INTERNALIZATION

EPadpt=>EPadptint : Internalization 31  
vf=kint\*EPadpt

EAPadpt=>EAPadptint : Internalization 32  
vf=kint\*EAPadpt

EIPadpt=>EIPadptint : Internalization 33  
vf=kint\*EIPadpt

ESPadpt=>ESPadptint : Internalization 34  
vf=kint\*ESPadpt

ESAPadpt=>ESAPadptint : Internalization 35  
vf=kint\*ESAPadpt

ESIPadpt=>ESIPadptint : Internalization 36  
vf=kint\*ESIPadpt

EPEPadpt=>EPEPadptint : Internalization 37  
vf=kint\*EPEPadpt

EAPEAPadpt=>EAPEAPadptint : Internalization 38  
vf=kint\*EAPEAPadpt

EIPEIPadpt=>EIPEIPadptint : Internalization 39  
vf=kint\*EIPEIPadpt

ESPEPadpt=>ESPEPadptint : Internalization 40  
vf=kint\*ESPEPadpt

ESAPEAPadpt=>ESAPEAPadptint : Internalization 41  
vf=kint\*ESAPEAPadpt

ESIPEIPadpt=>ESIPEIPadptint : Internalization 42  
vf=kint\*ESIPEIPadpt

ESPESPadpt=>ESPESPadptint : Internalization 43  
vf=kint\*ESPESPadpt

ESAPESAPadpt=>ESAPESAPadptint : Internalization 44  
vf=kint\*ESAPESAPadpt

ESIPESIPadpt=>ESIPESIPadptint : Internalization 45  
vf=kint\*ESIPESIPadpt

EPcetadpt=>EPcetadptint : Internalization 52  
vf=kint\*EPcetadpt

EAPcetadpt=>EAPcetadptint : Internalization 53  
vf=kint\*EAPcetadpt

EIPcetadpt=>EIPcetadptint : Internalization 54  
vf=kint\*EIPcetadpt

%ATP BINDING TO MONOMERS IN THE ENDOSOME

Eint<=>EAint : Internal Monomer ATP Binding 1

vf=katpon\*Eint\*ATPconc

vr=katpoff\*EAint

ESint<=>ESAint : Internal Monomer ATP Binding 2

vf=katpon\*ESint\*ATPconc

vr=katpoff\*ESAint

EPint<=>EAPint : Internal Monomer ATP Binding 3

vf=katpon\*EPint\*ATPconc

vr=katpoff\*EAPint

ESPint<=>ESAPint : Internal Monomer ATP Binding 4

vf=katpon\*ESPint\*ATPconc

vr=katpoff\*ESAPint

EPadptint<=>EAPadptint : Internal Monomer ATP Binding 5

vf=katpon\*EPadptint\*ATPconc

vr=katpoff\*EAPadptint

ESPadptint<=>ESAPadptint : Internal Monomer ATP Binding 6

vf=katpon\*ESPadptint\*ATPconc

vr=katpoff\*ESAPadptint

Ecetint<=>EAcetint : Internal Monomer ATP Binding 7

vf=katpon\*Ecetint\*ATPconc

vr=katpoff\*EAcetint

EPcetint<=>EAPcetint : Internal Monomer ATP Binding 8

vf=katpon\*EPcetint\*ATPconc

vr=katpoff\*EAPcetint

EPcetadptint<=>EAPcetadptint : Internal Monomer ATP Binding 9

vf=katpon\*EPcetadptint\*ATPconc

vr=katpoff\*EAPcetadptint

%INH BINDING TO MONOMERS IN THE ENDOSOME

Eint<=>EIint : Internal Monomer Inhibitor Binding 1

vf=kinhon\*Eint\*INHconc

vr=kinhoff\*EIint

ESint<=>ESIint : Internal Monomer Inhibitor Binding 2

vf=kinhon\*ESint\*INHconc

vr=kinhoff\*ESIint

EPint<=>EIPint : Internal Monomer Inhibitor Binding 3

vf=kinhon\*EPint\*INHconc

$vr=kinhoff*EIPint$

ESPint $\rightleftharpoons$ ESIPint : Internal Monomer Inhibitor Binding 4

$vf=kinhon*ESPint*INHconc$

$vr=kinhoff*ESIPint$

EPadptint $\rightleftharpoons$ EIPadptint : Internal Monomer Inhibitor Binding 5

$vf=kinhon*EPadptint*INHconc$

$vr=kinhoff*EIPadptint$

ESPadptint $\rightleftharpoons$ ESIPadptint : Internal Monomer Inhibitor Binding 6

$vf=kinhon*ESPadptint*INHconc$

$vr=kinhoff*ESIPadptint$

Ecetint $\rightleftharpoons$ EIcetint : Internal Monomer Inhibitor Binding 7

$vf=kinhon*Ecetint*INHconc$

$vr=kinhoff*EIcetint$

EPcetint $\rightleftharpoons$ EIPcetint : Internal Monomer Inhibitor Binding 8

$vf=kinhon*EPcetint*INHconc$

$vr=kinhoff*EIPcetint$

EPcetadptint $\rightleftharpoons$ EIPcetadptint : Internal Monomer Inhibitor Binding 9

$vf=kinhon*EPcetadptint*INHconc$

$vr=kinhoff*EIPcetadptint$

%LIGAND BINDING TO MONOMERS IN THE ENDOSOME

Eint+Sint $\rightleftharpoons$ ESint : Internal Monomer EGF Binding 1

$vf=kegfonint*Eint*Sint$

$vr=kegfoffint*ESint$

EAint+Sint $\rightleftharpoons$ ESAint : Internal Monomer EGF Binding 2

$vf=kegfonint*EAint*Sint$

$vr=kegfoffint*ESAint$

EIint+Sint $\rightleftharpoons$ ESIint : Internal Monomer EGF Binding 3

$vf=kegfonint*EIint*Sint$

$vr=kegfoffint*ESIint$

EPint+Sint $\rightleftharpoons$ ESPint : Internal Monomer EGF Binding 4

$vf=kegfonint*EPint*Sint$

$vr=kegfoffint*ESPint$

EAPint+Sint $\rightleftharpoons$ ESAPint : Internal Monomer EGF Binding 5

$vf=kegfonint*EAPint*Sint$

$vr=kegfoffint*ESAPint$

EIPint+Sint $\rightleftharpoons$ ESIPint : Internal Monomer EGF Binding 6

$vf=kegfonint*EIPint*Sint$

$vr=kegfoffint*ESIPint$

E<sub>Padptint</sub>+S<sub>int</sub> $\rightleftharpoons$ E<sub>S<sub>Padptint</sub></sub> : Internal Monomer EGF Binding 7

vf=kegfonint\*E<sub>Padptint</sub>\*S<sub>int</sub>  
vr=kegfoffint\*E<sub>S<sub>Padptint</sub></sub>

E<sub>A<sub>Padptint</sub></sub>+S<sub>int</sub> $\rightleftharpoons$ E<sub>S<sub>A<sub>Padptint</sub></sub></sub> : Internal Monomer EGF Binding 8

vf=kegfonint\*E<sub>A<sub>Padptint</sub></sub>\*S<sub>int</sub>  
vr=kegfoffint\*E<sub>S<sub>A<sub>Padptint</sub></sub></sub>

E<sub>I<sub>Padptint</sub></sub>+S<sub>int</sub> $\rightleftharpoons$ E<sub>S<sub>I<sub>Padptint</sub></sub></sub> : Internal Monomer EGF Binding 9

vf=kegfonint\*E<sub>I<sub>Padptint</sub></sub>\*S<sub>int</sub>  
vr=kegfoffint\*E<sub>S<sub>I<sub>Padptint</sub></sub></sub>

% DIMERIZATION IN THE ABSENCE OF EGF IN THE ENDOSOME

E<sub>int</sub>+E<sub>int</sub> $\rightleftharpoons$ E<sub>E<sub>int</sub></sub> : Internal Dimerization no EGF 1

vf=kdimonINT\*E<sub>int</sub>\*E<sub>int</sub>  
vr=kdimoffNOEGF\*E<sub>E<sub>int</sub></sub>

E<sub>A<sub>int</sub></sub>+E<sub>A<sub>int</sub></sub> $\rightleftharpoons$ E<sub>A<sub>E<sub>A<sub>int</sub></sub></sub></sub> : Internal Dimerization no EGF 2

vf=kdimonINT\*E<sub>A<sub>int</sub></sub>\*E<sub>A<sub>int</sub></sub>  
vr=kdimoffNOEGF\*E<sub>A<sub>E<sub>A<sub>int</sub></sub></sub></sub>

E<sub>I<sub>int</sub></sub>+E<sub>I<sub>int</sub></sub> $\rightleftharpoons$ E<sub>I<sub>E<sub>I<sub>int</sub></sub></sub></sub> : Internal Dimerization no EGF 3

vf=kdimonINT\*E<sub>I<sub>int</sub></sub>\*E<sub>I<sub>int</sub></sub>  
vr=kdimoffNOEGF\*E<sub>I<sub>E<sub>I<sub>int</sub></sub></sub></sub>

E<sub>P<sub>int</sub></sub>+E<sub>P<sub>int</sub></sub> $\rightleftharpoons$ E<sub>P<sub>E<sub>P<sub>int</sub></sub></sub></sub> : Internal Dimerization no EGF 4

vf=kdimonINT\*E<sub>P<sub>int</sub></sub>\*E<sub>P<sub>int</sub></sub>  
vr=kdimoffNOEGF\*E<sub>P<sub>E<sub>P<sub>int</sub></sub></sub></sub>

E<sub>A<sub>P<sub>int</sub></sub></sub>+E<sub>A<sub>P<sub>int</sub></sub></sub> $\rightleftharpoons$ E<sub>A<sub>P<sub>E<sub>A<sub>P<sub>int</sub></sub></sub></sub></sub> : Internal Dimerization no EGF 5</sub>

vf=kdimonINT\*E<sub>A<sub>P<sub>int</sub></sub></sub>\*E<sub>A<sub>P<sub>int</sub></sub></sub>  
vr=kdimoffNOEGF\*E<sub>A<sub>P<sub>E<sub>A<sub>P<sub>int</sub></sub></sub></sub></sub></sub>

E<sub>I<sub>P<sub>int</sub></sub></sub>+E<sub>I<sub>P<sub>int</sub></sub></sub> $\rightleftharpoons$ E<sub>I<sub>P<sub>E<sub>I<sub>P<sub>int</sub></sub></sub></sub></sub> : Internal Dimerization no EGF 6</sub>

vf=kdimonINT\*E<sub>I<sub>P<sub>int</sub></sub></sub>\*E<sub>I<sub>P<sub>int</sub></sub></sub>  
vr=kdimoffNOEGF\*E<sub>I<sub>P<sub>E<sub>I<sub>P<sub>int</sub></sub></sub></sub></sub></sub>

E<sub>Padptint</sub>+E<sub>Padptint</sub> $\rightleftharpoons$ E<sub>P<sub>E<sub>Padptint</sub></sub></sub> : Internal Dimerization no EGF 7

vf=kdimonINT\*E<sub>Padptint</sub>\*E<sub>Padptint</sub>  
vr=kdimoffNOEGF\*E<sub>P<sub>E<sub>Padptint</sub></sub></sub>

E<sub>A<sub>Padptint</sub></sub>+E<sub>A<sub>Padptint</sub></sub> $\rightleftharpoons$ E<sub>A<sub>P<sub>E<sub>A<sub>Padptint</sub></sub></sub></sub> : Internal Dimerization no EGF 8</sub>

vf=kdimonINT\*E<sub>A<sub>Padptint</sub></sub>\*E<sub>A<sub>Padptint</sub></sub>  
vr=kdimoffNOEGF\*E<sub>A<sub>P<sub>E<sub>A<sub>Padptint</sub></sub></sub></sub></sub>

E<sub>I<sub>Padptint</sub></sub>+E<sub>I<sub>Padptint</sub></sub> $\rightleftharpoons$ E<sub>I<sub>P<sub>E<sub>I<sub>Padptint</sub></sub></sub></sub> : Internal Dimerization no EGF 9</sub>

vf=kdimonINT\*E<sub>I<sub>Padptint</sub></sub>\*E<sub>I<sub>Padptint</sub></sub>  
vr=kdimoffNOEGF\*E<sub>I<sub>P<sub>E<sub>I<sub>Padptint</sub></sub></sub></sub></sub>

%ASSYMETRIC DIMERIZATION IN THE ENDOSOME

ESint+Eint<=>ESEint : Internal Dimerization Assymetric 1  
vf=kdimonINT\*ESint\*Eint  
vr=kdimoffEGF\*ESEint

ESAint+EAint<=>ESAEAint : Internal Dimerization Assymetric 2  
vf=kdimonINT\*ESAint\*EAint  
vr=kdimoffEGF\*ESAEAint

ESlint+EIint<=>ESIEIint : Internal Dimerization Assymetric 3  
vf=kdimonINT\*ESlint\*EIint  
vr=kdimoffEGF\*ESIEIint

ESPint+EPint<=>ESPEPint : Internal Dimerization Assymetric 4  
vf=kdimonINT\*ESPint\*EPint  
vr=kdimoffEGF\*ESPEPint

ESAPint+EAPint<=>ESAPEAPint : Internal Dimerization Assymetric 5  
vf=kdimonINT\*ESAPint\*EAPint  
vr=kdimoffEGF\*ESAPEAPint

ESIPint+EIPint<=>ESIPEIPint : Internal Dimerization Assymetric 6  
vf=kdimonINT\*ESIPint\*EIPint  
vr=kdimoffEGF\*ESIPEIPint

ESPadptint+EPadptint<=>ESPEPadptint : Internal Dimerization Assymetric 7  
vf=kdimonINT\*ESPadptint\*EPadptint  
vr=kdimoffEGF\*ESPEPadptint

ESAPadptint+EAPadptint<=>ESAPEAPadptint : Internal Dimerization Assymetric 8  
vf=kdimonINT\*ESAPadptint\*EAPadptint  
vr=kdimoffEGF\*ESAPEAPadptint

ESIPadptint+EIPadptint<=>ESIPEIPadptint : Internal Dimerization Assymetric 9  
vf=kdimonINT\*ESIPadptint\*EIPadptint  
vr=kdimoffEGF\*ESIPEIPadptint

%DIMERIZATION IN THE PRESENCE OF EGF IN THE ENDOSOME

ESint+ESint<=>ESESint : Internal Dimerization EGF 1  
vf=kdimonINT\*ESint\*ESint  
vr=kdimoffEGF\*ESESint

ESAint+ESAint<=>ESAESAint : Internal Dimerization EGF 2  
vf=kdimonINT\*ESAint\*ESAint  
vr=kdimoffEGF\*ESAESAint

ESlint+ESlint<=>ESIESIint : Internal Dimerization EGF 3  
vf=kdimonINT\*ESlint\*ESlint  
vr=kdimoffEGF\*ESIESIint

ESPint+ESPint<=>ESPESAPint : Internal Dimerization EGF 4  
vf=kdimonINT\*ESPint\*ESPint  
vr=kdimoffEGF\*ESPESAPint

ESAPint+ESAPint<=>ESAPESAPint : Internal Dimerization EGF 5  
vf=kdimonINT\*ESAPint\*ESAPint  
vr=kdimoffEGF\*ESAPESAPint

ESIPint+ESIPint<=>ESIPESIPint : Internal Dimerization EGF 6  
vf=kdimonINT\*ESIPint\*ESIPint  
vr=kdimoffEGF\*ESIPESIPint

ESPadptint+ESPadptint<=>ESPESAPadptint : Internal Dimerization EGF 7  
vf=kdimonINT\*ESPadptint\*ESPadptint  
vr=kdimoffEGF\*ESPESAPadptint

ESAPadptint+ESAPadptint<=>ESAPESAPadptint : Internal Dimerization EGF 8  
vf=kdimonINT\*ESAPadptint\*ESAPadptint  
vr=kdimoffEGF\*ESAPESAPadptint

ESIPadptint+ESIPadptint<=>ESIPESIPadptint : Internal Dimerization EGF 9  
vf=kdimonINT\*ESIPadptint\*ESIPadptint  
vr=kdimoffEGF\*ESIPESIPadptint

#### % DIMER ATP BINDING IN THE ENDOSOME

EEint<=>EAEAint : Internal Dimer ATP Binding 1  
vf=katpon\*EEint\*ATPconc  
vr=katpoff\*EAEAint

ESEint<=>ESAEAint : Internal Dimer ATP Binding 2  
vf=katpon\*ESEint\*ATPconc  
vr=katpoff\*ESAEAint

ESESint<=>ESAESAint : Internal Dimer ATP Binding 3  
vf=katpon\*ESESint\*ATPconc  
vr=katpoff\*ESAESAint

EPEPint<=>EAPEAPint : Internal Dimer ATP Binding 4  
vf=katpon\*EPEPint\*ATPconc  
vr=katpoff\*EAPEAPint

ESPEPint<=>ESAPEAPint : Internal Dimer ATP Binding 5  
vf=katpon\*ESPEPint\*ATPconc  
vr=katpoff\*ESAPEAPint

ESPESAPint<=>ESAPESAPint : Internal Dimer ATP Binding 6  
vf=katpon\*ESPESAPint\*ATPconc  
vr=katpoff\*ESAPESAPint



EPEPadptint<=>EAPEAPadptint : Internal Dimer ATP Binding 7

vf=katpon\*EPEPadptint\*ATPconc

vr=katpoff\*EAPEAPadptint

ESPEPadptint<=>ESAPEAPadptint : Internal Dimer ATP Binding 8

vf=katpon\*ESPEPadptint\*ATPconc

vr=katpoff\*ESAPEAPadptint

ESPESPadptint<=>ESAPESAPadptint : Internal Dimer ATP Binding 9

vf=katpon\*ESPESPadptint\*ATPconc

vr=katpoff\*ESAPESAPadptint

%DIMER INH BINDING IN THE ENDOSOME

EEint<=>EIEIint : Internal Dimer INH Binding 1

vf=kinhon\*EEint\*INHconc

vr=kinhoff\*EIEIint

ESEint<=>ESIEIint : Internal Dimer INH Binding 2

vf=kinhon\*ESEint\*INHconc

vr=kinhoff\*ESIEIint

ESESint<=>ESIESint : Internal Dimer INH Binding 3

vf=kinhon\*ESESint\*INHconc

vr=kinhoff\*ESIESint

EPEPint<=>EIPEIPint : Internal Dimer INH Binding 4

vf=kinhon\*EPEPint\*INHconc

vr=kinhoff\*EIPEIPint

ESPEPint<=>ESIPEIPint : Internal Dimer INH Binding 5

vf=kinhon\*ESPEPint\*INHconc

vr=kinhoff\*ESIPEIPint

ESPESPint<=>ESIPESIPint : Internal Dimer INH Binding 6

vf=kinhon\*ESPESPint\*INHconc

vr=kinhoff\*ESIPESIPint

EPEPadptint<=>EIPEIPadptint : Internal Dimer INH Binding 7

vf=kinhon\*EPEPadptint\*INHconc

vr=kinhoff\*EIPEIPadptint

ESPEPadptint<=>ESIPEIPadptint : Internal Dimer INH Binding 8

vf=kinhon\*ESPEPadptint\*INHconc

vr=kinhoff\*ESIPEIPadptint

ESPESPadptint<=>ESIPESIPadptint : Internal Dimer INH Binding 9

vf=kinhon\*ESPESPadptint\*INHconc

vr=kinhoff\*ESIPESIPadptint

%DIMER EGF BINDING IN THE ENDOSOME

$EEint+ Sint \rightleftharpoons ESEint$  : Internal Dimer EGF Binding 1  
 $vf=2*kegfonint*Sint*EEint$   
 $vr=kegfoffint*ESEint$

$ESEint+ Sint \rightleftharpoons ESESint$  : Internal Dimer EGF Binding 2  
 $vf=kegfonint*Sint*ESEint$   
 $vr=kegfoffint*ESESint$

$EAEAint+ Sint \rightleftharpoons ESAEAint$  : Internal Dimer EGF Binding 3  
 $vf=2*kegfonint*Sint*EAEAint$   
 $vr=kegfoffint*ESAEAint$

$ESAEAint+ Sint \rightleftharpoons ESAESAint$  : Internal Dimer EGF Binding 4  
 $vf=kegfonint*Sint*ESAEAint$   
 $vr=kegfoffint*ESAESAint$

$EIEIint+ Sint \rightleftharpoons ESIEIint$  : Internal Dimer EGF Binding 5  
 $vf=2*kegfonint*Sint*EIEIint$   
 $vr=kegfoffint*ESIEIint$

$ESIEIint+ Sint \rightleftharpoons ESIESIint$  : Internal Dimer EGF Binding 6  
 $vf=kegfonint*Sint*ESIEIint$   
 $vr=kegfoffint*ESIESIint$

$EPEPint+ Sint \rightleftharpoons ESPEPint$  : Internal Dimer EGF Binding 7  
 $vf=2*kegfonint*Sint*EPEPint$   
 $vr=kegfoffint*ESPEPint$

$ESPEPint+ Sint \rightleftharpoons ESPESPint$  : Internal Dimer EGF Binding 8  
 $vf=kegfonint*Sint*ESPEPint$   
 $vr=kegfoffint*ESPESPint$

$EAPEAPint+ Sint \rightleftharpoons ESAPEAPint$  : Internal Dimer EGF Binding 9  
 $vf=2*kegfonint*Sint*EAPEAPint$   
 $vr=kegfoffint*ESAPEAPint$

$ESAPEAPint+ Sint \rightleftharpoons ESAPESAPint$  : Internal Dimer EGF Binding 10  
 $vf=kegfonint*Sint*ESAPEAPint$   
 $vr=kegfoffint*ESAPESAPint$

$EIPEIPint+ Sint \rightleftharpoons ESIPPEIPint$  : Internal Dimer EGF Binding 11  
 $vf=2*kegfonint*Sint*EIPEIPint$   
 $vr=kegfoffint*ESIPPEIPint$

$ESIPPEIPint+ Sint \rightleftharpoons ESIPESIPint$  : Internal Dimer EGF Binding 12  
 $vf=kegfonint*Sint*ESIPPEIPint$   
 $vr=kegfoffint*ESIPESIPint$

$EPEPadptint+ Sint \rightleftharpoons ESPEPadptint$  : Internal Dimer EGF Binding 13  
 $vf=2*kegfonint*Sint*EPEPadptint$

$vr = \text{kegfoffint} * \text{ESPEPadptint}$

ESPEPadptint+Sint $\rightleftharpoons$ ESPESPadptint : Internal Dimer EGF Binding 14

$vf = \text{kegfonint} * \text{Sint} * \text{ESPEPadptint}$

$vr = \text{kegfoffint} * \text{ESPESPadptint}$

EAPEAPadptint+Sint $\rightleftharpoons$ ESAPEAPadptint : Internal Dimer EGF Binding 15

$vf = 2 * \text{kegfonint} * \text{Sint} * \text{EAPEAPadptint}$

$vr = \text{kegfoffint} * \text{ESAPEAPadptint}$

ESAPEAPadptint+Sint $\rightleftharpoons$ ESAPESAPadptint : Internal Dimer EGF Binding 16

$vf = \text{kegfonint} * \text{Sint} * \text{ESAPEAPadptint}$

$vr = \text{kegfoffint} * \text{ESAPESAPadptint}$

EIPEIPadptint+Sint $\rightleftharpoons$ ESIPEIPadptint : Internal Dimer EGF Binding 17

$vf = 2 * \text{kegfonint} * \text{Sint} * \text{EIPEIPadptint}$

$vr = \text{kegfoffint} * \text{ESIPEIPadptint}$

ESIPEIPadptint+Sint $\rightleftharpoons$ ESIPESIPadptint : Internal Dimer EGF Binding 18

$vf = \text{kegfonint} * \text{Sint} * \text{ESIPEIPadptint}$

$vr = \text{kegfoffint} * \text{ESIPESIPadptint}$

%PHOSPHORYLATION IN THE ENDOSOME

EAEAint $\Rightarrow$ EPEPint : Internal Phosphorylation 1

$vf = \text{kcatNOEGF} * \text{EAEAint}$

ESAEAint $\Rightarrow$ ESPEPint : Internal Phosphorylation 2

$vf = \text{kcatEGF} * \text{ESAEAint}$

ESAESAint $\Rightarrow$ ESPESPint : Internal Phosphorylation 3

$vf = \text{kcatEGF} * \text{ESAESAint}$

%DEPHOSPHORYLATION IN THE ENDOSOME

EPint $\Rightarrow$ Eint : Internal Dephosphorylation 1

$vf = \text{kdephosINT} * \text{EPint}$

EAPint $\Rightarrow$ EAint : Internal Dephosphorylation 2

$vf = \text{kdephosINT} * \text{EAPint}$

EIPint $\Rightarrow$ EInt : Internal Dephosphorylation 3

$vf = \text{kdephosINT} * \text{EIPint}$

ESPint $\Rightarrow$ ESint : Internal Dephosphorylation 4

$vf = \text{kdephosINT} * \text{ESPint}$

ESAPint $\Rightarrow$ ESAint : Internal Dephosphorylation 5

$vf = \text{kdephosINT} * \text{ESAPint}$

ESIPint $\Rightarrow$ ESInt : Internal Dephosphorylation 6

$vf = k_{\text{dephosINT}} * \text{ESIPint}$   
 EPEPint=>EEint : Internal Dephosphorylation 7  
 $vf = k_{\text{dephosINT}} * \text{EPEPint}$   
 EAPEAPint=>EAEAint : Internal Dephosphorylation 8  
 $vf = k_{\text{dephosINT}} * \text{EAPEAPint}$   
 EIPEIPint=>EIEIint : Internal Dephosphorylation 9  
 $vf = k_{\text{dephosINT}} * \text{EIPEIPint}$   
 ESPEPint=>ESEint : Internal Dephosphorylation 10  
 $vf = k_{\text{dephosINT}} * \text{ESPEPint}$   
 ESAPEAPint=>ESAEAint : Internal Dephosphorylation 11  
 $vf = k_{\text{dephosINT}} * \text{ESAPEAPint}$   
 ESIPEIPint=>ESIEIint : Internal Dephosphorylation 12  
 $vf = k_{\text{dephosINT}} * \text{ESIPEIPint}$   
 ESPESPint=>ESESint : Internal Dephosphorylation 13  
 $vf = k_{\text{dephosINT}} * \text{ESPESPint}$   
 ESAPESAPint=>ESAESAint : Internal Dephosphorylation 14  
 $vf = k_{\text{dephosINT}} * \text{ESAPESAPint}$   
 ESIPESIPint=>ESIESIint : Internal Dephosphorylation 15  
 $vf = k_{\text{dephosINT}} * \text{ESIPESIPint}$   
 EPcetint=>Ecetint : Internal Dephosphorylation 16  
 $vf = k_{\text{dephosINT}} * \text{EPcetint}$   
 EAPcetint=>EAcetint : Internal Dephosphorylation 17  
 $vf = k_{\text{dephosINT}} * \text{EAPcetint}$   
 EIPcetint=>EIceint : Internal Dephosphorylation 18  
 $vf = k_{\text{dephosINT}} * \text{EIPcetint}$   
 % ADAPTER BINDING IN THE CELL INTERIOR  
 EPint+adpt<=>EPadptint : Internal Adapter Binding 1  
 $vf = k_{\text{adpton}} * \text{EPint} * \text{adpt}$   
 $vr = k_{\text{adptoff}} * \text{EPadptint}$   
 EAPint+adpt<=>EAPadptint : Internal Adapter Binding 2  
 $vf = k_{\text{adpton}} * \text{EAPint} * \text{adpt}$   
 $vr = k_{\text{adptoff}} * \text{EAPadptint}$   
 EIPint+adpt<=>EIPadptint : Internal Adapter Binding 3  
 $vf = k_{\text{adpton}} * \text{EIPint} * \text{adpt}$   
 $vr = k_{\text{adptoff}} * \text{EIPadptint}$

ESPint+adpt<=>ESPadptint : Internal Adapter Binding 4  
 vf=kadpton\*ESPint\*adpt  
 vr=kadptoff\*ESPadptint

ESAPint+adpt<=>ESAPadptint : Internal Adapter Binding 5  
 vf=kadpton\*ESAPint\*adpt  
 vr=kadptoff\*ESAPadptint

ESIPint+adpt<=>ESIPadptint : Internal Adapter Binding 6  
 vf=kadpton\*ESIPint\*adpt  
 vr=kadptoff\*ESIPadptint

EPEPint+2\*adpt<=>EPEPadptint : Internal Adapter Binding 7  
 vf=kadpton\*EPEPint\*adpt  
 vr=kadptoff\*EPEPadptint

EAPEAPint+2\*adpt<=>EAPEAPadptint : Internal Adapter Binding 8  
 vf=kadpton\*EAPEAPint\*adpt  
 vr=kadptoff\*EAPEAPadptint

EIPEIPint+2\*adpt<=>EIPEIPadptint : Internal Adapter Binding 9  
 vf=kadpton\*EIPEIPint\*adpt  
 vr=kadptoff\*EIPEIPadptint

ESPEPint+2\*adpt<=>ESPEPadptint : Internal Adapter Binding 10  
 vf=kadpton\*ESPEPint\*adpt  
 vr=kadptoff\*ESPEPadptint

ESAPEAPint+2\*adpt<=>ESAPEAPadptint : Internal Adapter Binding 11  
 vf=kadpton\*ESAPEAPint\*adpt  
 vr=kadptoff\*ESAPEAPadptint

ESIPEIPint+2\*adpt<=>ESIPEIPadptint : Internal Adapter Binding 12  
 vf=kadpton\*ESIPEIPint\*adpt  
 vr=kadptoff\*ESIPEIPadptint

ESPESPint+2\*adpt<=>ESPESPadptint : Internal Adapter Binding 13  
 vf=kadpton\*ESPESPint\*adpt  
 vr=kadptoff\*ESPESPadptint

ESAPESAPint+2\*adpt<=>ESAPESAPadptint : Internal Adapter Binding 14  
 vf=kadpton\*ESAPESAPint\*adpt  
 vr=kadptoff\*ESAPESAPadptint

ESIPESIPint+2\*adpt<=>ESIPESIPadptint : Internal Adapter Binding 15  
 vf=kadpton\*ESIPESIPint\*adpt  
 vr=kadptoff\*ESIPESIPadptint

EPcetint+adpt<=>EPcetadptint : Internal Adapter Binding 16  
 vf=kadpton\*EPcetint\*adpt

$vr = kadptoff * EPcetadptint$

EAPcetint+adpt $\Leftrightarrow$ EAPcetadptint : Internal Adapter Binding 17

$vf = kadpton * EAPcetint * adpt$

$vr = kadptoff * EAPcetadptint$

EIPcetint+adpt $\Leftrightarrow$ EIPcetadptint : Internal Adapter Binding 18

$vf = kadpton * EIPcetint * adpt$

$vr = kadptoff * EIPcetadptint$

%UNOCCUPIED DEGRADATION

Eint $\Rightarrow$ debris : Unoccupied Degradation 1

$vf = kexit * (1 - frecunoc) * Eint$

EAAint $\Rightarrow$ debris : Unoccupied Degradation 2

$vf = kexit * (1 - frecunoc) * EAAint$

EIint $\Rightarrow$ debris : Unoccupied Degradation 3

$vf = kexit * (1 - frecunoc) * EIint$

EPint $\Rightarrow$ debris : Unoccupied Degradation 4

$vf = kexit * (1 - frecunoc) * EPint$

EAPint $\Rightarrow$ debris : Unoccupied Degradation 5

$vf = kexit * (1 - frecunoc) * EAPint$

EIPint $\Rightarrow$ debris : Unoccupied Degradation 6

$vf = kexit * (1 - frecunoc) * EIPint$

EEint $\Rightarrow$ debris : Unoccupied Degradation 7

$vf = kexit * (1 - frecunoc) * EEint$

EAAint $\Rightarrow$ debris : Unoccupied Degradation 8

$vf = kexit * (1 - frecunoc) * EAAint$

EIEint $\Rightarrow$ debris : Unoccupied Degradation 9

$vf = kexit * (1 - frecunoc) * EIEint$

EPEPint $\Rightarrow$ debris : Unoccupied Degradation 10

$vf = kexit * (1 - frecunoc) * EPEPint$

EAAPEPint $\Rightarrow$ debris : Unoccupied Degradation 11

$vf = kexit * (1 - frecunoc) * EAAPEPint$

EIPEIPint $\Rightarrow$ debris : Unoccupied Degradation 12

$vf = kexit * (1 - frecunoc) * EIPEIPint$

EPadptint $\Rightarrow$ adpt+debris : Unoccupied Degradation 13

$vf = kexit * (1 - frecunoc) * EPadptint$

EAPadptint=>adpt+debris : Unoccupied Degradation 14  
vf=kexit\*(1-frecunoc)\*EAPadptint

EIPadptint=>adpt+debris : Unoccupied Degradation 15  
vf=kexit\*(1-frecunoc)\*EIPadptint

EPEPadptint=>2\*adpt+debris : Unoccupied Degradation 16  
vf=kexit\*(1-frecunoc)\*EPEPadptint

EAPEAPadptint=>2\*adpt+debris : Unoccupied Degradation 17  
vf=kexit\*(1-frecunoc)\*EAPEAPadptint

EIPEIPadptint=>2\*adpt+debris : Unoccupied Degradation 18  
vf=kexit\*(1-frecunoc)\*EIPEIPadptint

Ecetint=>debrisCET : Unoccupied Degradation 19  
vf=kexit\*(1-frecunoc)\*Ecetint

EAcetint=>debrisCET : Unoccupied Degradation 20  
vf=kexit\*(1-frecunoc)\*EAcetint

EIcetint=>debrisCET : Unoccupied Degradation 21  
vf=kexit\*(1-frecunoc)\*EIcetint

EPcetint=>debrisCET : Unoccupied Degradation 22  
vf=kexit\*(1-frecunoc)\*EPcetint

EAPcetint=>debrisCET : Unoccupied Degradation 23  
vf=kexit\*(1-frecunoc)\*EAPcetint

EIPcetint=>debrisCET : Unoccupied Degradation 24  
vf=kexit\*(1-frecunoc)\*EIPcetint

EPcetadptint=>adpt+debrisCET : Unoccupied Degradation 25  
vf=kexit\*(1-frecunoc)\*EPcetadptint

EAPcetadptint=>adpt+debrisCET : Unoccupied Degradation 26  
vf=kexit\*(1-frecunoc)\*EAPcetadptint

EIPcetadptint=>adpt+debrisCET : Unoccupied Degradation 27  
vf=kexit\*(1-frecunoc)\*EIPcetadptint

#### %HALF-OCCUPIED DEGRADATION

ESEint=>debrisEGF : Half Occupied Degradation 1  
vf=kexit\*(1-frecoc)\*ESEint

ESAEAint=>debrisEGF : Half Occupied Degradation 2  
vf=kexit\*(1-frecoc)\*ESAEAint

ESIEIint=>debrisEGF : Half Occupied Degradation 3

$$vf=kexit*(1-frecoc)*ESIEIint$$

$$ESPEPint=>debrisEGF : Half Occupied Degradation 4 \\ vf=kexit*(1-frecoc)*ESPEPint$$

$$ESAPEAPint=>debrisEGF : Half Occupied Degradation 5 \\ vf=kexit*(1-frecoc)*ESAPEAPint$$

$$ESIPEIPint=>debrisEGF : Half Occupied Degradation 6 \\ vf=kexit*(1-frecoc)*ESIPEIPint$$

$$ESPEPadptint=>2*adpt+debrisEGF : Half Occupied Degradation 7 \\ vf=kexit*(1-frecoc)*ESPEPadptint$$

$$ESAPEAPadptint=>2*adpt+debrisEGF : Half Occupied Degradation 8 \\ vf=kexit*(1-frecoc)*ESAPEAPadptint$$

$$ESIPEIPadptint=>2*adpt+debrisEGF : Half Occupied Degradation 9 \\ vf=kexit*(1-frecoc)*ESIPEIPadptint$$

% OCCUPIED DEGRADATION

$$ESint=>debrisEGF : Occupied Degradation 1 \\ vf=kexit*(1-frecoc)*ESint$$

$$ESAint=>debrisEGF : Occupied Degradation 2 \\ vf=kexit*(1-frecoc)*ESAint$$

$$ESIint=>debrisEGF : Occupied Degradation 3 \\ vf=kexit*(1-frecoc)*ESIint$$

$$ESPint=>debrisEGF : Occupied Degradation 4 \\ vf=kexit*(1-frecoc)*ESPint$$

$$ESAPint=>debrisEGF : Occupied Degradation 5 \\ vf=kexit*(1-frecoc)*ESAPint$$

$$ESIPint=>debrisEGF : Occupied Degradation 6 \\ vf=kexit*(1-frecoc)*ESIPint$$

$$ESESint=>2*debrisEGF : Occupied Degradation 7 \\ vf=kexit*(1-frecoc)*ESESint$$

$$ESAESAint=>2*debrisEGF : Occupied Degradation 8 \\ vf=kexit*(1-frecoc)*ESAESAint$$

$$ESIESIint=>2*debrisEGF : Occupied Degradation 9 \\ vf=kexit*(1-frecoc)*ESIESIint$$

$$ESPESPint=>2*debrisEGF : Occupied Degradation 10 \\ vf=kexit*(1-frecoc)*ESPESPint$$



ESAPESAPint=>2\*debrisEGF : Occupied Degradation 11  
vf=kexit\*(1-frecoc)\*ESAPESAPint

ESIPESIPint=>2\*debrisEGF : Occupied Degradation 12  
vf=kexit\*(1-frecoc)\*ESIPESIPint

ESPadptint=>adpt+debrisEGF : Occupied Degradation 13  
vf=kexit\*(1-frecoc)\*ESPadptint

ESAPadptint=>adpt+debrisEGF : Occupied Degradation 14  
vf=kexit\*(1-frecoc)\*ESAPadptint

ESIPadptint=>adpt+debrisEGF : Occupied Degradation 15  
vf=kexit\*(1-frecoc)\*ESIPadptint

ESPESPadptint=>2\*adpt+2\*debrisEGF : Occupied Degradation 16  
vf=kexit\*(1-frecoc)\*ESPESPadptint

ESAPESAPadptint=>2\*adpt+2\*debrisEGF : Occupied Degradation 17  
vf=kexit\*(1-frecoc)\*ESAPESAPadptint

ESIPESIPadptint=>2\*adpt+2\*debrisEGF : Occupied Degradation 18  
vf=kexit\*(1-frecoc)\*ESIPESIPadptint

%UNOCCUPIED RECYCLE

Eint=>E : Unoccupied Recycle 1  
vf=kexit\*frecunoc\*Eint

EAint=>EA : Unoccupied Recycle 2  
vf=kexit\*frecunoc\*EAint

EIint=>EI : Unoccupied Recycle 3  
vf=kexit\*frecunoc\*EIint

EPint=>EP : Unoccupied Recycle 4  
vf=kexit\*frecunoc\*EPint

EAPint=>EAP : Unoccupied Recycle 5  
vf=kexit\*frecunoc\*EAPint

EIPint=>EIP : Unoccupied Recycle 6  
vf=kexit\*frecunoc\*EIPint

EEint=>EE : Unoccupied Recycle 7  
vf=kexit\*frecunoc\*EEint

EAEAint=>EAEA : Unoccupied Recycle 8  
vf=kexit\*frecunoc\*EAEAint

EIEIint=>EIEI : Unoccupied Recycle 9  
vf=kexit\*frecunoc\*EIEIint

EPEPint=>EPEP : Unoccupied Recycle 10  
vf=kexit\*frecunoc\*EPEPint

EAPEAPint=>EAPEAP : Unoccupied Recycle 11  
vf=kexit\*frecunoc\*EAPEAPint

EIPEIPint=>EIPEIP : Unoccupied Recycle 12  
vf=kexit\*frecunoc\*EIPEIPint

EPadptint=>EPadpt : Unoccupied Recycle 13  
vf=kexit\*frecunoc\*EPadptint

EAPadptint=>EAPadpt : Unoccupied Recycle 14  
vf=kexit\*frecunoc\*EAPadptint

EIPadptint=>EIPadpt : Unoccupied Recycle 15  
vf=kexit\*frecunoc\*EIPadptint

EPEPadptint=>EPEPadpt : Unoccupied Recycle 16  
vf=kexit\*frecunoc\*EPEPadptint

EAPEAPadptint=>EAPEAPadpt : Unoccupied Recycle 17  
vf=kexit\*frecunoc\*EAPEAPadptint

EIPEIPadptint=>EIPEIPadpt : Unoccupied Recycle 18  
vf=kexit\*frecunoc\*EIPEIPadptint

Ecetint=>Ecet : Unoccupied Recycle 19  
vf=kexit\*frecunoc\*Ecetint

EAcetint=>EAcet : Unoccupied Recycle 20  
vf=kexit\*frecunoc\*EAcetint

EIcetint=>EICet : Unoccupied Recycle 21  
vf=kexit\*frecunoc\*EICetint

EPcetint=>EPcet : Unoccupied Recycle 22  
vf=kexit\*frecunoc\*EPcetint

EAPcetint=>EAPcet : Unoccupied Recycle 23  
vf=kexit\*frecunoc\*EAPcetint

EIPcetint=>EIPcet : Unoccupied Recycle 24  
vf=kexit\*frecunoc\*EIPcetint

EPcetadptint=>EPcetadpt : Unoccupied Recycle 25  
vf=kexit\*frecunoc\*EPcetadptint

EAPcetadptint=>EAPcetadpt : Unoccupied Recycle 26  
vf=kexit\*frecunoc\*EAPcetadptint

EIPcetadptint=>EIPcetadpt : Unoccupied Recycle 27  
vf=kexit\*frecunoc\*EIPcetadptint

%HALF-OCCUPIED RECYCLE

ESEint=>ESE : Half Occupied Recycle 1  
vf=kexit\*frecoc\*ESEint

ESAEAint=>ESAEA : Half Occupied Recycle 2  
vf=kexit\*frecoc\*ESAEAint

ESIEIint=>ESIEI : Half Occupied Recycle 3  
vf=kexit\*frecoc\*ESIEIint

ESPEPint=>ESPEP : Half Occupied Recycle 4  
vf=kexit\*frecoc\*ESPEPint

ESAPEAPint=>ESAPEAP : Half Occupied Recycle 5  
vf=kexit\*frecoc\*ESAPEAPint

ESIPEIPint=>ESIPEIP : Half Occupied Recycle 6  
vf=kexit\*frecoc\*ESIPEIPint

ESPEPadptint=>ESPEPadpt : Half Occupied Recycle 7  
vf=kexit\*frecoc\*ESPEPadptint

ESAPEAPadptint=>ESAPEAPadpt : Half Occupied Recycle 8  
vf=kexit\*frecoc\*ESAPEAPadptint

ESIPEIPadptint=>ESIPEIPadpt : Half Occupied Recycle 9  
vf=kexit\*frecoc\*ESIPEIPadptint

%OCCUPIED RECYCLE

ESint=>ES : Occupied Recycle 1  
vf=kexit\*frecoc\*ESint

ESAint=>ESA : Occupied Recycle 2  
vf=kexit\*frecoc\*ESAint

ESIint=>ESI : Occupied Recycle 3  
vf=kexit\*frecoc\*ESIint

ESPint=>ESP : Occupied Recycle 4  
vf=kexit\*frecoc\*ESPint

ESAPint=>ESAP : Occupied Recycle 5  
vf=kexit\*frecoc\*ESAPint

ESIPint=>ESIP : Occupied Recycle 6  
vf=kexit\*frecoc\*ESIPint

ESESint=>ESES : Occupied Recycle 7  
vf=kexit\*frecoc\*ESESint

ESAESAint=>ESAESA : Occupied Recycle 8  
vf=kexit\*frecoc\*ESAESAint

ESIESInt=>ESIESI : Occupied Recycle 9  
vf=kexit\*frecoc\*ESIESInt

ESPESPint=>ESPESP : Occupied Recycle 10  
vf=kexit\*frecoc\*ESPESPint

ESAPESAPint=>ESAPESAP : Occupied Recycle 11  
vf=kexit\*frecoc\*ESAPESAPint

ESIPESIPint=>ESIPESIP : Occupied Recycle 12  
vf=kexit\*frecoc\*ESIPESIPint

ESPadptint=>ESPadpt : Occupied Recycle 13  
vf=kexit\*frecoc\*ESPadptint

ESAPadptint=>ESAPadpt : Occupied Recycle 14  
vf=kexit\*frecoc\*ESAPadptint

ESIPadptint=>ESIPadpt : Occupied Recycle 15  
vf=kexit\*frecoc\*ESIPadptint

ESPESPadptint=>ESPESPadpt : Occupied Recycle 16  
vf=kexit\*frecoc\*ESPESPadptint

ESAPESAPadptint=>ESAPESAPadpt : Occupied Recycle 17  
vf=kexit\*frecoc\*ESAPESAPadptint

ESIPESIPadptint=>ESIPESIPadpt : Occupied Recycle 18  
vf=kexit\*frecoc\*ESIPESIPadptint

\*\*\*\*\* MODEL FUNCTIONS

\*\*\*\*\* MODEL EVENTS

\*\*\*\*\* MODEL MATLAB FUNCTIONS
